# Supplementary material for: Metal oxidation states in biological water splitting
Source: PubMed Central journal article supplement — Chem Sci. 2015 Jan 9;6(3):1676–95. doi: 10.1039/c4sc03720k (PMC5639794; doi:10.1039/c4sc03720k), 2015-01-09
Supplement: SC-006-C4SC03720K-s001.pdf [file SC-006-C4SC03720K-s001.pdf]

# Metal oxidation states in biological water splitting

*Vera Krewald*<sup>†</sup>, *Marius Retegan*<sup>†</sup>, *Nicholas Cox*<sup>‡</sup>, *Johannes Messinger*<sup>‡</sup>, *Wolfgang Lubitz*<sup>†</sup>,  
*Serena DeBeer*<sup>†</sup>, *Frank Neese*<sup>†</sup>, *Dimitrios A. Pantazis*<sup>†\*</sup>

<sup>†</sup> Max Planck Institute for Chemical Energy Conversion, Stiftstr. 34-38,  
45470 Mülheim an der Ruhr, Germany.

<sup>‡</sup> Department of Chemistry, Chemical Biological Center (KBC), Umeå University,  
90187 Umeå, Sweden.

## Supporting Information

### Contents:

|       |                                                                                                   |     |
|-------|---------------------------------------------------------------------------------------------------|-----|
| I.    | Additional computational details and results on model complexes                                   | S2  |
| II.   | Schematic diagrams of additional models and 3D representations of the inorganic cores             | S5  |
| III.  | Exchange coupling constants and <sup>55</sup> Mn HFCs of all models                               | S10 |
| IV.   | Listing of Mn–Mn, Mn–Ca, Mn–O, Ca–O, and Mn–W distances of all models                             | S16 |
| V.    | Mulliken spin populations for Mn ions of the inorganic core in all models                         | S24 |
| VI.   | 2.5 K Q-band <sup>55</sup> Mn-Davies ENDOR of the OEC S <sub>2</sub> state of <i>T. elongatus</i> | S26 |
| VII.  | Additional analysis of calculated Mn K pre-edge X-ray absorption spectra                          | S29 |
| VIII. | Discussion of low-valent models in terms of super-reduced S states                                | S32 |

## Part I. Additional computational details and results on model complexes

### Backbone constraints

Selected backbone atoms were constrained to the coordinates of the 1.9 Å resolution crystallographic model (PDB ID 3ARC, PSII monomer A),<sup>1</sup> in order to ensure that the geometry optimizations of all OEC models remain consistent with the higher-order protein folding conformation, and to provide anchor points for residues that are not part of a continuous peptide chain (such as Tyr161). The constrained atoms are depicted in Figure S1.

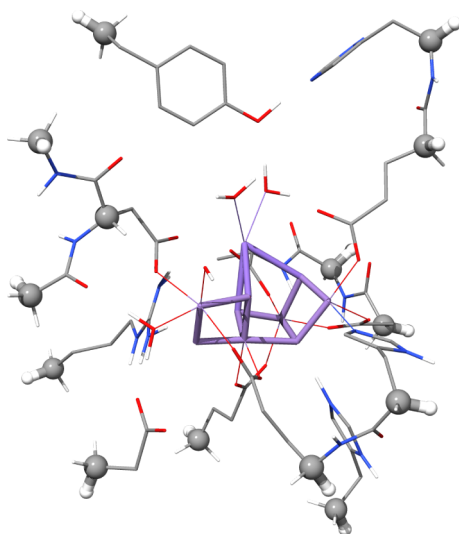

**Figure S1.** One of the computational models used in this study, with the constrained backbone carbon atoms and connected constrained hydrogen atoms shown as spheres. Non-coordinating waters and many hydrogen atoms have been omitted for clarity.

### Prediction of ground state spin multiplicity as a reliable criterion for model evaluation

The present theoretical approach<sup>2-5</sup> consists of using broken-symmetry DFT to obtain the exchange coupling constants  $J_{ij}$  by singular value decomposition and then diagonalizing the Heisenberg–Dirac–van Vleck Hamiltonian with these exchange coupling constants in order to obtain the ladder of spin states. Its success in accurately predicting the nature of magnetic coupling in manganese dimers has been amply demonstrated in the literature by various research groups for a large number of systems (see for example<sup>6-10</sup>) and needs not be emphasized again here. The method was so far proven to perform flawlessly for Mn

complexes of higher nuclearity as well.<sup>2,5,11</sup> Figures S2 and S3 collect some examples, most of them previously unpublished, of trinuclear and tetranuclear Mn complexes with magnetically interacting Mn ions in various oxidation states and various coordination/bridging geometries. Regardless of the spin topology, the nature of the (super)exchange interactions and the final total spin that is observed experimentally, the current approach always yields the correct ground state multiplicity.

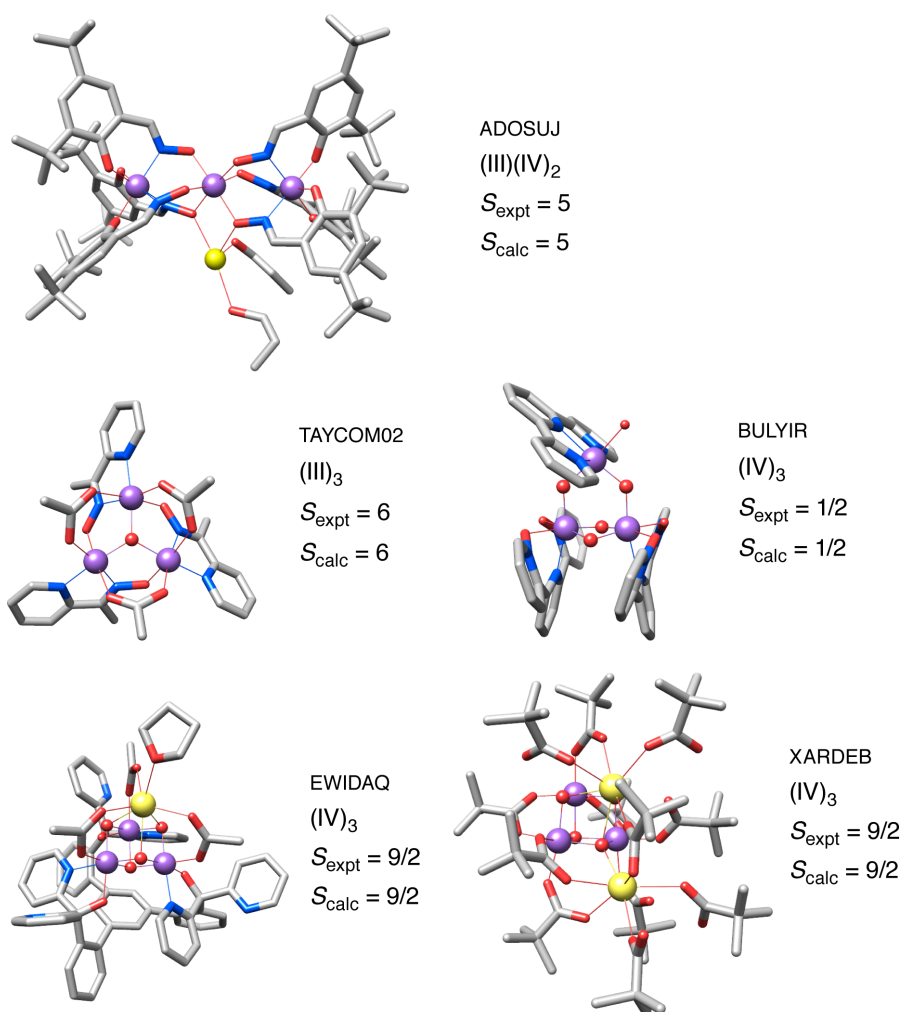

**Figure S2.** Examples of synthetic exchange-coupled trinuclear Mn complexes.<sup>11-15</sup> For each one, the Cambridge Structural Database (CSD) access code is provided, followed by the Mn oxidation states of the compound, the experimentally determined ground state spin, and the ground state spin computed by the method employed in this work.

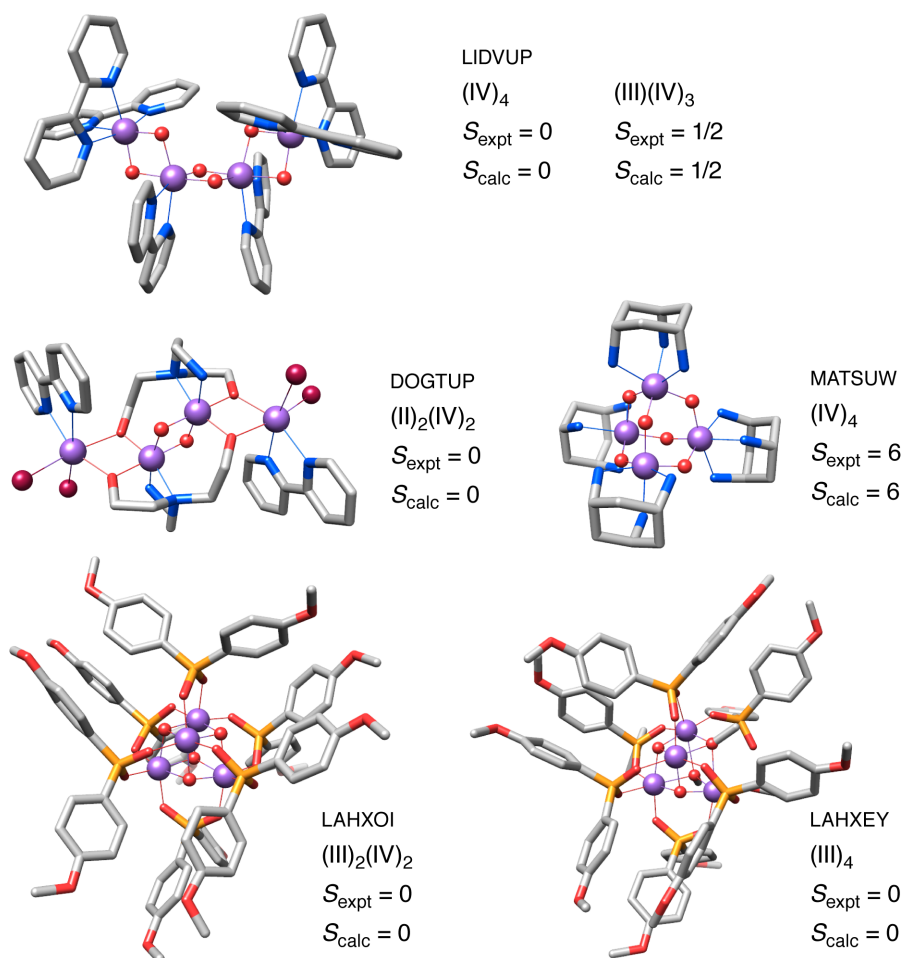

**Figure S3.** Examples of synthetic exchange-coupled tetranuclear Mn complexes.<sup>16-20</sup> For each one, the CSD access code is provided, followed by the Mn oxidation states of the compound, the experimentally determined ground state spin, and the ground state spin computed by the method employed in this work.

## Part II. Schematic diagrams of additional models and 3D core representations

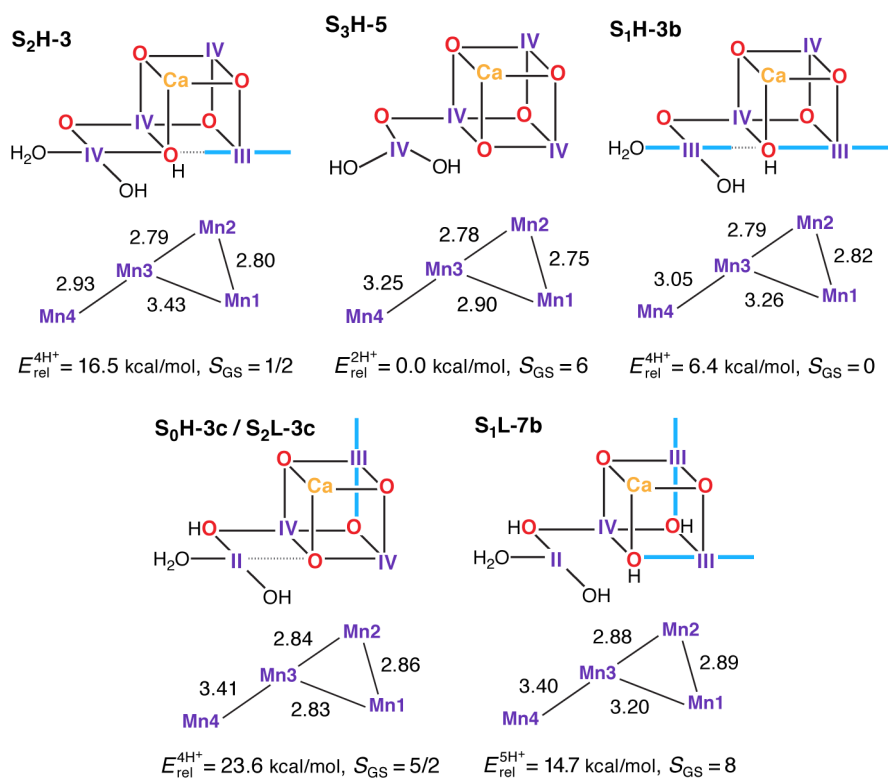

**Figure S4.** Additional models not shown in the main text.

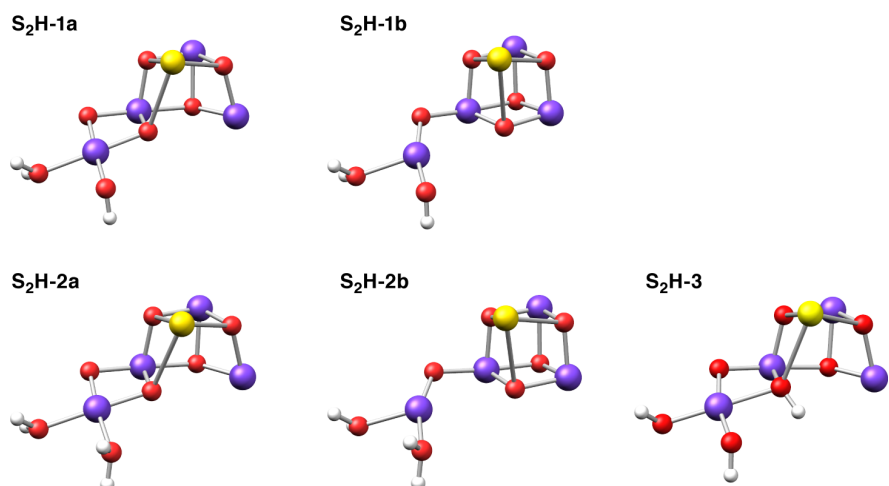

**Figure S5.** Optimized core geometries for the S<sub>2</sub>H models. Color code: Mn purple, Ca yellow, O red, H white.

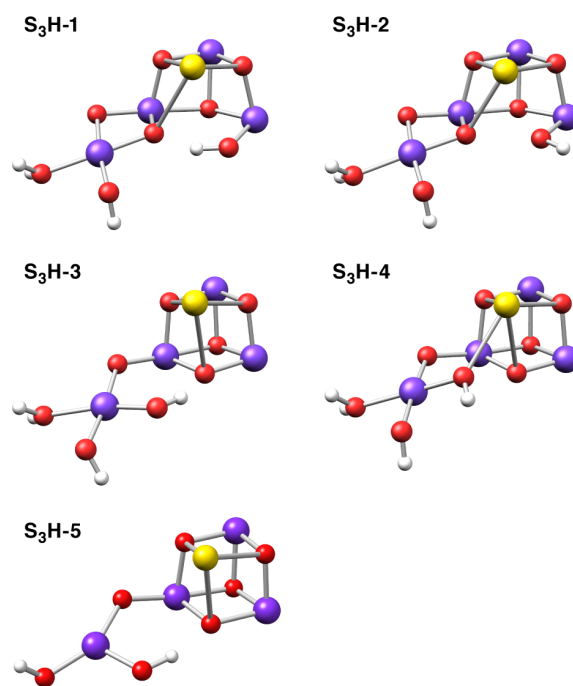

**Figure S6.** Optimized core geometries for the S<sub>3</sub>H models.

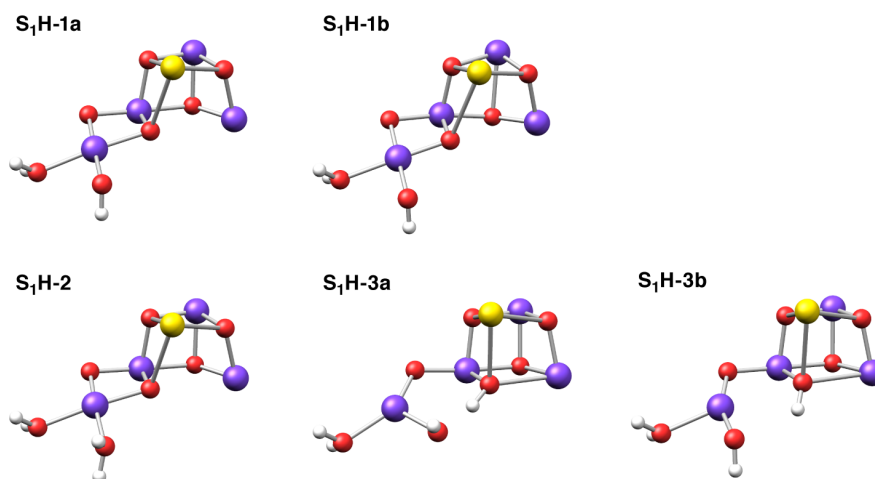

**Figure S7.** Optimized core geometries for the S<sub>1</sub>H models.

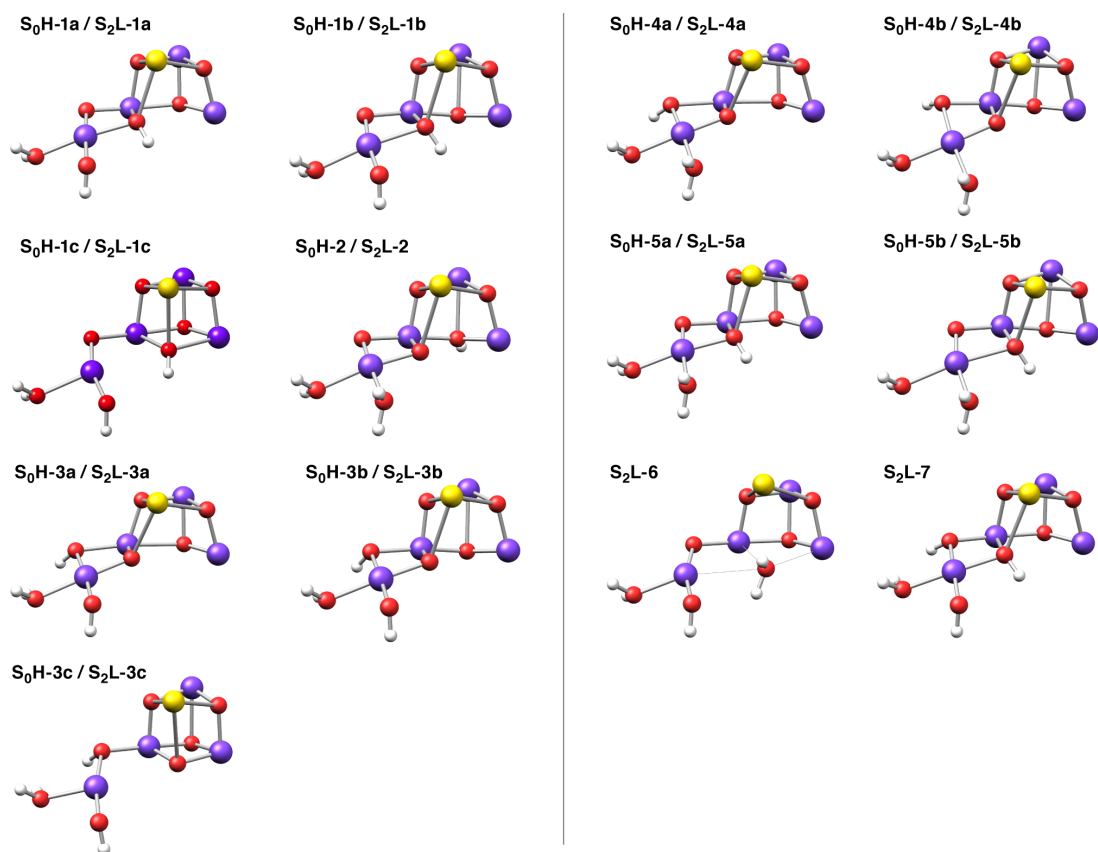

**Figure S8.** Optimized core geometries for the  $S_0H$  and  $S_2L$  models.

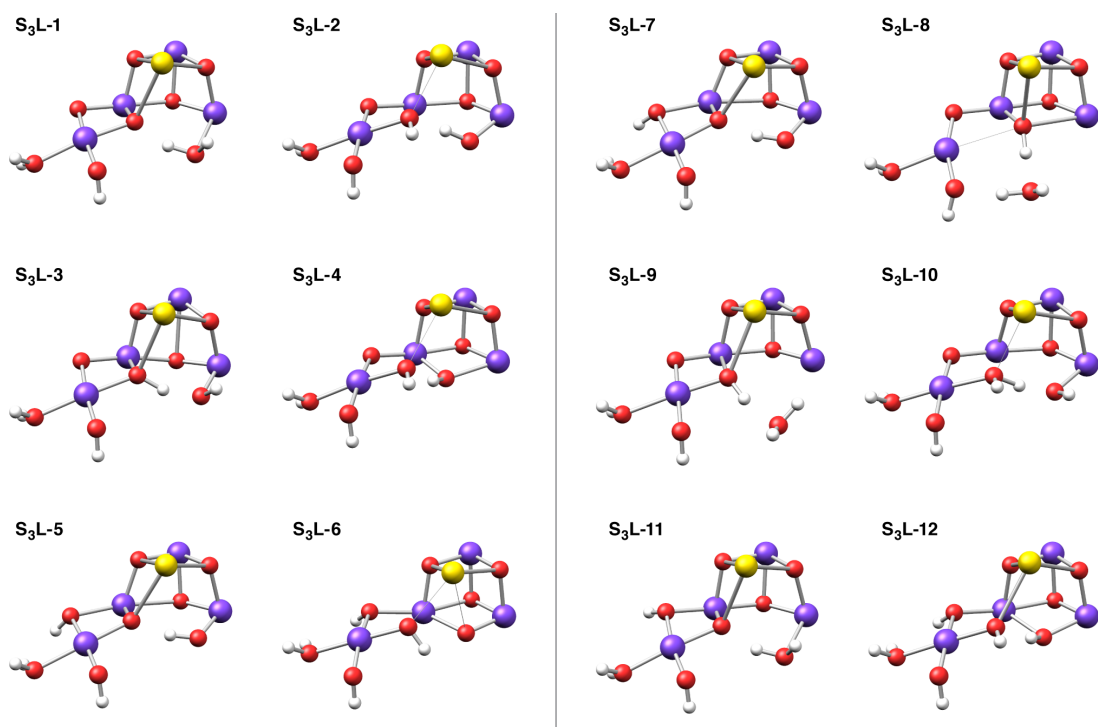

**Figure S9.** Optimized core geometries for the  $S_3L$  models.

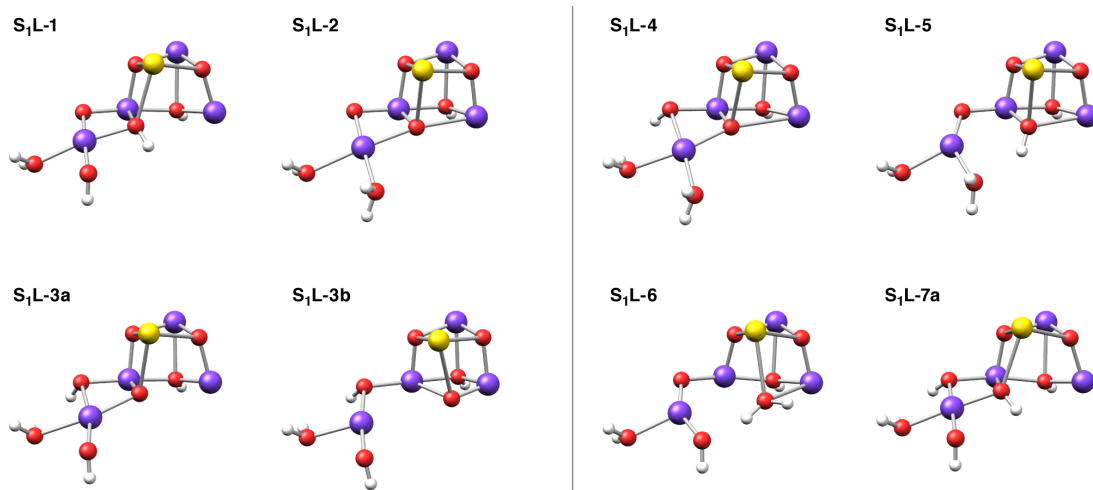

**Figure S10.** Optimized core geometries for the  $S_1L$  models.

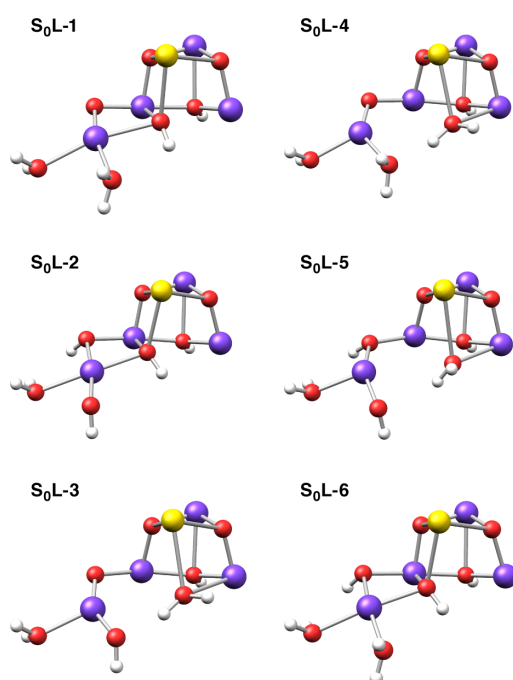

**Figure S11.** Optimized core geometries for the  $S_0L$  models.



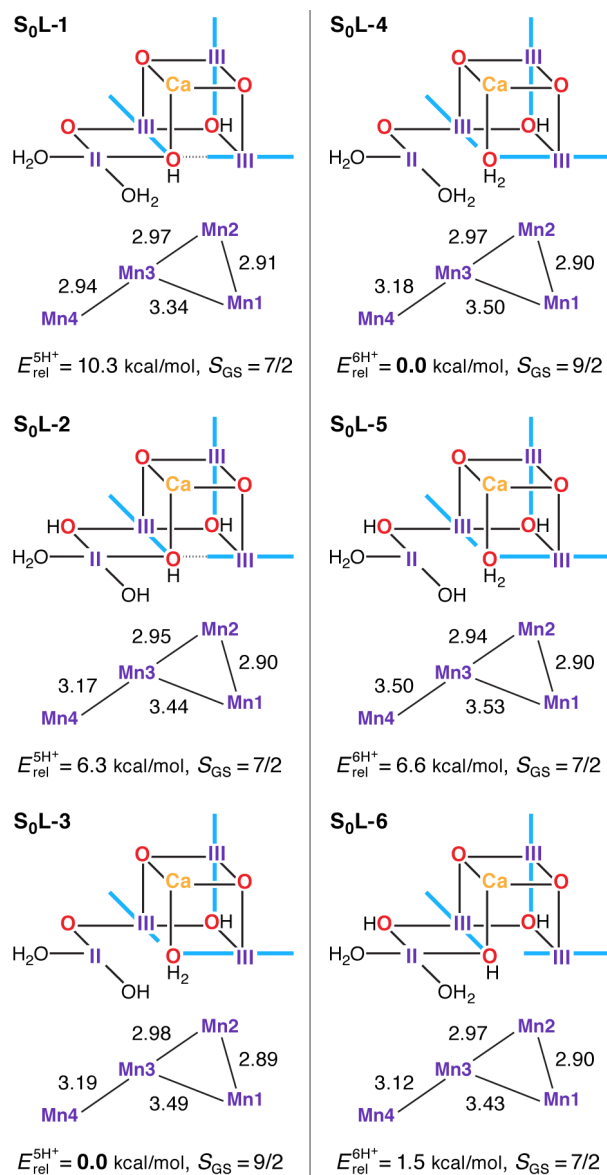

**Figure S12.** Protonation patterns, oxidation states, relative total energies and ground spin states for the S<sub>0</sub>L models. Blue lines indicate the orientation of Jahn–Teller axes.

### Part III. Exchange coupling constants and additional spectroscopic properties

**Table S1.** Exchange coupling constants  $J$  ( $\text{cm}^{-1}$ ), ground spin state ( $S_{\text{GS}}$ ), first excited spin state ( $S_{\text{ES}}$ ) and their energy separation  $\Delta E$  ( $\text{cm}^{-1}$ ) for the  $\text{S}_2\text{H}$  models.

|                |                          | $J_{12}$ | $J_{13}$ | $J_{14}$ | $J_{23}$ | $J_{24}$ | $J_{34}$ | $S_{\text{GS}}$ | $S_{\text{ES}}$ | $\Delta E$ |
|----------------|--------------------------|----------|----------|----------|----------|----------|----------|-----------------|-----------------|------------|
| 3 $\text{H}^+$ | <b>S<sub>2</sub>H-1a</b> | -15.8    | 1.9      | 1.2      | 23.1     | 1.9      | -13.9    | 1/2             | 3/2             | 22.0       |
|                | <b>S<sub>2</sub>H-1b</b> | 30.5     | 12.9     | 4.5      | 36.5     | 1.3      | -7.3     | 5/2             | 7/2             | 0.3        |
| 4 $\text{H}^+$ | <b>S<sub>2</sub>H-2a</b> | -15.4    | 1.5      | 1.3      | 23.7     | 1.7      | -13.1    | 1/2             | 3/2             | 21.2       |
|                | <b>S<sub>2</sub>H-2b</b> | 32.6     | 11.7     | 4.0      | 37.3     | 1.5      | -2.6     | 13/2            | 11/2            | 10.5       |
|                | <b>S<sub>2</sub>H-3</b>  | -14.7    | -4.6     | 0.3      | 17.9     | 1.7      | -13.4    | 1/2             | 3/2             | 24.7       |

**Table S2.** Exchange coupling constants  $J$  ( $\text{cm}^{-1}$ ), ground spin state ( $S_{\text{GS}}$ ), first excited spin state ( $S_{\text{ES}}$ ) and their energy separation  $\Delta E$  ( $\text{cm}^{-1}$ ) for the  $\text{S}_3\text{H}$  models.

|                |                         | $J_{12}$ | $J_{13}$ | $J_{14}$ | $J_{23}$ | $J_{24}$ | $J_{34}$ | $S_{\text{GS}}$ | $S_{\text{ES}}$ | $\Delta E$ |
|----------------|-------------------------|----------|----------|----------|----------|----------|----------|-----------------|-----------------|------------|
| 4 $\text{H}^+$ | <b>S<sub>3</sub>H-1</b> | 12.4     | -5.6     | 3.9      | 18.7     | 0.9      | -14.7    | 3               | 4               | 16.3       |
|                | <b>S<sub>3</sub>H-2</b> | 14.1     | -5.0     | 4.8      | 9.5      | 1.2      | -19.8    | 3               | 4               | 28.1       |
|                | <b>S<sub>3</sub>H-3</b> | 30.0     | 5.4      | 2.2      | 34.8     | 1.6      | -8.4     | 3               | 4               | 9.9        |
|                | <b>S<sub>3</sub>H-4</b> | 29.4     | 11.4     | 0.5      | 33.0     | 1.9      | -8.8     | 3               | 4               | 15.6       |
|                | <b>S<sub>3</sub>H-5</b> | 31.5     | 9.7      | 4.8      | 30.7     | 2.2      | 0.9      | 6               | 5               | 30.9       |

**Table S3.** Exchange coupling constants  $J$  ( $\text{cm}^{-1}$ ), ground spin state ( $S_{\text{GS}}$ ), first excited spin state ( $S_{\text{ES}}$ ) and their energy separation  $\Delta E$  ( $\text{cm}^{-1}$ ) for the  $\text{S}_1\text{H}$  models.

|                |                          | $J_{12}$ | $J_{13}$ | $J_{14}$ | $J_{23}$ | $J_{24}$ | $J_{34}$ | $S_{\text{GS}}$ | $S_{\text{ES}}$ | $\Delta E$ |
|----------------|--------------------------|----------|----------|----------|----------|----------|----------|-----------------|-----------------|------------|
| 3 $\text{H}^+$ | <b>S<sub>1</sub>H-1a</b> | -15.6    | 7.7      | -6.0     | 21.0     | 0.8      | -56.9    | 0               | 1               | 16.9       |
|                | <b>S<sub>1</sub>H-1b</b> | 6.1      | -3.4     | 1.7      | 31.4     | -0.3     | -10.7    | 4               | 3               | 15.8       |
| 4 $\text{H}^+$ | <b>S<sub>1</sub>H-2</b>  | -15.2    | 6.8      | -6.0     | 17.4     | 1.4      | -71.0    | 0               | 1               | 23.1       |
|                | <b>S<sub>1</sub>H-3a</b> | -21.9    | 14.2     | -1.3     | 21.9     | 1.8      | -25.5    | 0               | 1               | 23.0       |
|                | <b>S<sub>1</sub>H-3b</b> | -21.7    | 10.7     | -6.9     | 19.6     | 0.7      | -9.5     | 0               | 1               | 2.6        |

**Table S4.** Exchange coupling constants  $J$  ( $\text{cm}^{-1}$ ), ground spin state ( $S_{\text{GS}}$ ), first excited spin state ( $S_{\text{ES}}$ ) and their energy separation  $\Delta E$  ( $\text{cm}^{-1}$ ) for the  $S_0\text{H}$  and  $S_2\text{L}$  models.

|                |                                                                          | $J_{12}$ | $J_{13}$ | $J_{14}$ | $J_{23}$ | $J_{24}$ | $J_{34}$ | $S_{\text{GS}}$ | $S_{\text{ES}}$ | $\Delta E$ |
|----------------|--------------------------------------------------------------------------|----------|----------|----------|----------|----------|----------|-----------------|-----------------|------------|
| 4 $\text{H}^+$ | <b><math>S_0\text{H-1a}</math></b><br><b><math>S_2\text{L-1a}</math></b> | -15.5    | -5.7     | 0.0      | -35.2    | 1.1      | -0.4     | 1/2             | 3/2             | 1.9        |
|                | <b><math>S_0\text{H-1b}</math></b><br><b><math>S_2\text{L-1b}</math></b> | 4.5      | -7.4     | -2.5     | 32.3     | 1.1      | -2.3     | 7/2             | 5/2             | 1.3        |
|                | <b><math>S_0\text{H-1c}</math></b><br><b><math>S_2\text{L-1c}</math></b> | -32.2    | 4.1      | -6.3     | -40.1    | 0.1      | -4.0     | 1/2             | 3/2             | 21.3       |
|                | <b><math>S_0\text{H-2}</math></b><br><b><math>S_2\text{L-2}</math></b>   | 9.1      | 0.4      | 1.1      | 35.6     | 0.4      | -63.4    | 7/2             | 5/2             | 68.8       |
|                | <b><math>S_0\text{H-3a}</math></b><br><b><math>S_2\text{L-3a}</math></b> | -18.9    | -7.2     | -0.2     | 43.4     | -0.2     | -5.8     | 1/2             | 3/2             | 15.6       |
|                | <b><math>S_0\text{H-3b}</math></b><br><b><math>S_2\text{L-3b}</math></b> | 4.1      | 1.3      | 0.4      | 43.6     | -0.3     | -24.2    | 7/2             | 5/2             | 34.7       |
|                | <b><math>S_0\text{H-3c}</math></b><br><b><math>S_2\text{L-3c}</math></b> | 49.1     | 1.0      | 8.9      | 48.7     | 0.7      | -20.6    | 5/2             | 7/2             | 3.6        |
| 5 $\text{H}^+$ | <b><math>S_0\text{H-4a}</math></b><br><b><math>S_2\text{L-4a}</math></b> | -19.2    | -8.6     | 0.3      | 41.5     | 0.3      | 1.6      | 7/2             | 5/2             | 11.4       |
|                | <b><math>S_0\text{H-4b}</math></b><br><b><math>S_2\text{L-4b}</math></b> | 1.7      | -3.0     | 2.3      | 31.6     | 0.1      | 10.5     | 15/2            | 13/2            | 7.5        |
|                | <b><math>S_0\text{H-5a}</math></b><br><b><math>S_2\text{L-5a}</math></b> | -15.4    | -5.7     | 0.2      | -33.9    | 1.1      | 3.9      | 9/2             | 7/2             | 9.7        |
|                | <b><math>S_0\text{H-5b}</math></b><br><b><math>S_2\text{L-5b}</math></b> | 3.9      | -8.7     | -4.8     | 31.2     | 0.7      | 10.1     | 7/2             | 9/2             | 20.2       |
|                | <b><math>S_2\text{L-6}</math></b>                                        | -19.9    | -8.1     | -1.2     | -22.0    | 0.7      | -14.8    | 1/2             | 3/2             | 14.9       |
|                | <b><math>S_2\text{L-7}</math></b>                                        | -12.1    | -8.6     | 0.3      | -19.6    | 0.6      | 2.6      | 5/2             | 3/2             | 1.6        |

**Table S5.** Exchange coupling constants  $J$  ( $\text{cm}^{-1}$ ), ground spin state ( $S_{\text{GS}}$ ), first excited spin state ( $S_{\text{ES}}$ ) and their energy separation  $\Delta E$  ( $\text{cm}^{-1}$ ) for the  $S_3L$  models.

|                  |                          | $J_{12}$ | $J_{13}$ | $J_{14}$ | $J_{23}$ | $J_{24}$ | $J_{34}$ | $S_{\text{GS}}$ | $S_{\text{ES}}$ | $\Delta E$ |
|------------------|--------------------------|----------|----------|----------|----------|----------|----------|-----------------|-----------------|------------|
| 5 H <sup>+</sup> | <b>S<sub>3</sub>L-1</b>  | -27.8    | 1.1      | -8.7     | 6.7      | 0.3      | -56.8    | 0               | 1               | 43.3       |
|                  | <b>S<sub>3</sub>L-2</b>  | 12.4     | 2.6      | -2.7     | -29.5    | 1.3      | -14.4    | 3               | 2               | 7.0        |
|                  | <b>S<sub>3</sub>L-3</b>  | 20.5     | 2.3      | -0.6     | 42.5     | 5.6      | -24.1    | 3               | 4               | 30.1       |
|                  | <b>S<sub>3</sub>L-4</b>  | -33.0    | 25.0     | -2.1     | 17.6     | 0.8      | -19.1    | 0               | 1               | 24.7       |
|                  | <b>S<sub>3</sub>L-5</b>  | 24.8     | -28.2    | -2.2     | 44.4     | -0.4     | -4.1     | 0               | 1               | 0.3        |
|                  | <b>S<sub>3</sub>L-6</b>  | 37.0     | 28.6     | 0.5      | 3.5      | 0.1      | 9.9      | 7               | 6               | 46.4       |
|                  | <b>S<sub>3</sub>L-7</b>  | 24.9     | -23.4    | -2.2     | 44.0     | -0.4     | -3.7     | 1               | 2               | 7.1        |
| 6 H <sup>+</sup> | <b>S<sub>3</sub>L-8</b>  | -22.4    | 11.7     | -5.2     | 22.5     | 0.4      | 0.2      | 3               | 2               | 6.2        |
|                  | <b>S<sub>3</sub>L-9</b>  | -16.8    | -15.2    | 1.1      | -22.7    | -10.0    | -3.7     | 2               | 1               | 5.8        |
|                  | <b>S<sub>3</sub>L-10</b> | 9.4      | -4.2     | -1.7     | -25.3    | 1.2      | -17.2    | 3               | 2               | 35.3       |
|                  | <b>S<sub>3</sub>L-11</b> | -28.2    | 1.7      | -5.7     | 13.0     | -0.3     | -35.6    | 0               | 1               | 26.3       |
|                  | <b>S<sub>3</sub>L-12</b> | 28.5     | 27.9     | -0.5     | -20.8    | -0.2     | -3.2     | 1               | 2               | 0.1        |

**Table S6.** Exchange coupling constants  $J$  ( $\text{cm}^{-1}$ ), ground spin state ( $S_{\text{GS}}$ ), first excited spin state ( $S_{\text{ES}}$ ) and their energy separation  $\Delta E$  ( $\text{cm}^{-1}$ ) for the  $S_1L$  models.

|                  |                          | $J_{12}$ | $J_{13}$ | $J_{14}$ | $J_{23}$ | $J_{24}$ | $J_{34}$ | $S_{\text{GS}}$ | $S_{\text{ES}}$ | $\Delta E$ |
|------------------|--------------------------|----------|----------|----------|----------|----------|----------|-----------------|-----------------|------------|
| 4 H <sup>+</sup> | <b>S<sub>1</sub>L-1</b>  | 8.3      | -5.3     | 1.0      | 3.3      | 1.3      | 3.6      | 6               | 5               | 1.6        |
|                  | <b>S<sub>1</sub>L-2</b>  | 16.5     | 11.8     | -15.3    | 21.9     | -0.2     | -31.4    | 3               | 4               | 98.3       |
|                  | <b>S<sub>1</sub>L-3a</b> | 11.2     | 13.7     | -5.0     | 48.0     | 0.8      | -25.8    | 3               | 4               | 59.2       |
|                  | <b>S<sub>1</sub>L-3b</b> | 40.7     | 9.0      | -0.9     | 17.3     | 2.0      | -13.0    | 3               | 4               | 26.1       |
| 5 H <sup>+</sup> | <b>S<sub>1</sub>L-4</b>  | 11.3     | 12.6     | -6.6     | 35.0     | 0.1      | -34.6    | 3               | 4               | 76.7       |
|                  | <b>S<sub>1</sub>L-5</b>  | 13.4     | 6.8      | -5.0     | 21.1     | 0.1      | -49.5    | 3               | 4               | 74.6       |
|                  | <b>S<sub>1</sub>L-6</b>  | 6.8      | -11.3    | -2.5     | 6.2      | -2.6     | -31.0    | 3               | 4               | 6.3        |
|                  | <b>S<sub>1</sub>L-7a</b> | 8.7      | -7.4     | 2.7      | 24.0     | 2.9      | 5.7      | 8               | 7               | 6.1        |
|                  | <b>S<sub>1</sub>L-7b</b> | 5.1      | 10.4     | -2.0     | 46.0     | 2.7      | 4.1      | 8               | 7               | 14.4       |

**Table S7.** Exchange coupling constants  $J$  ( $\text{cm}^{-1}$ ), ground spin state ( $S_{\text{GS}}$ ), first excited spin state ( $S_{\text{ES}}$ ) and their energy separation  $\Delta E$  ( $\text{cm}^{-1}$ ) for the  $S_0L$  models.

|                  |                         | $J_{12}$ | $J_{13}$ | $J_{14}$ | $J_{23}$ | $J_{24}$ | $J_{34}$ | $S_{\text{GS}}$ | $S_{\text{ES}}$ | $\Delta E$ |
|------------------|-------------------------|----------|----------|----------|----------|----------|----------|-----------------|-----------------|------------|
| 5 H <sup>+</sup> | <b>S<sub>0</sub>L-1</b> | 11.5     | -0.4     | -6.6     | -4.6     | -0.1     | -26.2    | 7/2             | 5/2             | 36.4       |
|                  | <b>S<sub>0</sub>L-2</b> | 9.7      | -3.3     | -4.6     | 17.6     | -0.3     | -2.2     | 7/2             | 9/2             | 19.0       |
|                  | <b>S<sub>0</sub>L-3</b> | 9.7      | -6.6     | 0.5      | -0.6     | -0.5     | -36.3    | 9/2             | 7/2             | 36.2       |
| 6 H <sup>+</sup> | <b>S<sub>0</sub>L-4</b> | 9.8      | -7.6     | 0.0      | 0.8      | -0.4     | -39.0    | 9/2             | 7.2             | 29.6       |
|                  | <b>S<sub>0</sub>L-5</b> | 10.9     | -8.1     | -1.0     | 16.3     | -0.3     | -10.5    | 7/2             | 5/2             | 11.8       |
|                  | <b>S<sub>0</sub>L-6</b> | 7.9      | -3.2     | -3.6     | 13.0     | -0.2     | -3.7     | 7/2             | 9/2             | 21.5       |

**Table S8.** Isotropic raw hyperfine coupling constants and their components (ordered according to  $|A_1| < |A_2| < |A_3|$ ) for the **S<sub>3</sub>H** and **S<sub>3</sub>L** models. A scaling factor of 1.78 was applied.

|                          |            | $A_{\text{iso}}$ | $A_1$  | $A_2$  | $A_3$  |
|--------------------------|------------|------------------|--------|--------|--------|
| <b>S<sub>3</sub>H-1</b>  | <b>Mn1</b> | -88.5            | -80.3  | -87.6  | -97.7  |
|                          | <b>Mn2</b> | -85.8            | -78.5  | -84.2  | -94.6  |
|                          | <b>Mn3</b> | -92.2            | -82.5  | -90.2  | -103.8 |
|                          | <b>Mn4</b> | 123.6            | 114.5  | 120.0  | 136.3  |
| <b>S<sub>3</sub>H-2</b>  | <b>Mn1</b> | -91.6            | -83.9  | -90.4  | -100.4 |
|                          | <b>Mn2</b> | -99.7            | -92.8  | -95.6  | -110.7 |
|                          | <b>Mn3</b> | 122.3            | 111.0  | 121.6  | 134.4  |
|                          | <b>Mn4</b> | -125.5           | -114.0 | -122.1 | -140.5 |
| <b>S<sub>3</sub>H-3</b>  | <b>Mn1</b> | -85.5            | -81.0  | -84.6  | -91.1  |
|                          | <b>Mn2</b> | -84.5            | -78.7  | -85.9  | -88.9  |
|                          | <b>Mn3</b> | -81.2            | -73.7  | -77.8  | -92.0  |
|                          | <b>Mn4</b> | 119.1            | 115.0  | 118.9  | 123.5  |
| <b>S<sub>3</sub>H-4</b>  | <b>Mn1</b> | -80.4            | -73.2  | -79.6  | -88.6  |
|                          | <b>Mn2</b> | -85.0            | -79.1  | -86.8  | -89.1  |
|                          | <b>Mn3</b> | -74.4            | -63.1  | -74.5  | -85.5  |
|                          | <b>Mn4</b> | 116.0            | 113.9  | 115.3  | 118.8  |
| <b>S<sub>3</sub>L-2</b>  | <b>Mn1</b> | -94.0            | -87.8  | -94.4  | -99.8  |
|                          | <b>Mn2</b> | -98.4            | -94.5  | -95.6  | -105.1 |
|                          | <b>Mn3</b> | 84.8             | 19.3   | 114.5  | 120.5  |
|                          | <b>Mn4</b> | -92.0            | -28.1  | -106.5 | -141.3 |
| <b>S<sub>3</sub>L-3</b>  | <b>Mn1</b> | -98.0            | -93.6  | -97.2  | -103.3 |
|                          | <b>Mn2</b> | -113.6           | -52.4  | -126.9 | -161.5 |
|                          | <b>Mn3</b> | -103.2           | -91.9  | -101.6 | -116.2 |
|                          | <b>Mn4</b> | 136.9            | 73.8   | 146.0  | 190.9  |
| <b>S<sub>3</sub>L-8</b>  | <b>Mn1</b> | 96.5             | 34.1   | 121.6  | 133.9  |
|                          | <b>Mn2</b> | -105.4           | -101.5 | -103.0 | -111.6 |
|                          | <b>Mn3</b> | -95.1            | -88.0  | -95.3  | -101.9 |
|                          | <b>Mn4</b> | -113.1           | -52.4  | -127.0 | -159.7 |
| <b>S<sub>3</sub>L-10</b> | <b>Mn1</b> | -95.3            | -92.2  | -95.1  | -98.7  |
|                          | <b>Mn2</b> | -96.7            | -91.6  | -94.3  | -104.3 |
|                          | <b>Mn3</b> | 84.6             | 18.7   | 114.3  | 120.8  |
|                          | <b>Mn4</b> | -115.6           | -52.4  | -121.6 | -172.7 |

**Table S9.** Energetic separation  $\Delta E$  (in  $\text{cm}^{-1}$ ) between the ground state and the lowest energy spin states with spin  $S = 0$  and  $S = 1$  for the  $S_1L$  models. The number  $n$  indicates the number of intervening spin states, i.e. which excited state is the state shown.

|                  |                          | $\Delta E (S = 0)$ | $n$ | $\Delta E (S = 1)$ | $n$ |
|------------------|--------------------------|--------------------|-----|--------------------|-----|
| 4 H <sup>+</sup> | <b>S<sub>1</sub>L-1</b>  | 21.0               | 8   | 19.3               | 7   |
|                  | <b>S<sub>1</sub>L-2</b>  | 535.3              | 14  | 386.4              | 7   |
|                  | <b>S<sub>1</sub>L-3a</b> | 402.2              | 12  | 294.0              | 7   |
|                  | <b>S<sub>1</sub>L-3b</b> | 541.4              | 30  | 363.8              | 16  |
| 5 H <sup>+</sup> | <b>S<sub>1</sub>L-4</b>  | 401.9              | 9   | 293.2              | 5   |
|                  | <b>S<sub>1</sub>L-5</b>  | 356.8              | 10  | 266.6              | 5   |
|                  | <b>S<sub>1</sub>L-6</b>  | 37.1               | 4   | 28.7               | 3   |
|                  | <b>S<sub>1</sub>L-7a</b> | 167.2              | 22  | 152.6              | 18  |
|                  | <b>S<sub>1</sub>L-7b</b> | 299.5              | 24  | 231.3              | 19  |

**Table S10.** Energetic separation  $\Delta E$  (in  $\text{cm}^{-1}$ ) between the ground state and the lowest-energy spin state with  $S = 1/2$  for the  $S_0L$  models, and the number  $n$  of intervening spin states.

|                  |                          | $\Delta E$ | $n$ |
|------------------|--------------------------|------------|-----|
| 5 H <sup>+</sup> | <b>S<sub>0</sub>L-1</b>  | 146.1      | 10  |
|                  | <b>S<sub>0</sub>L-2</b>  | 140.7      | 15  |
|                  | <b>S<sub>0</sub>L-3a</b> | 178.5      | 10  |
| 6 H <sup>+</sup> | <b>S<sub>0</sub>L-4</b>  | 165.5      | 9   |
|                  | <b>S<sub>0</sub>L-5</b>  | 65.8       | 8   |
|                  | <b>S<sub>0</sub>L-6</b>  | 112.4      | 12  |

**Part IV. Mn–Mn, Mn–Ca, Mn–O, Ca–O, and Mn–W distances of all models**

|         | <b>S<sub>2</sub>H-1a</b> | <b>S<sub>2</sub>H-1b</b> | <b>S<sub>2</sub>H-2a</b> | <b>S<sub>2</sub>H-2b</b> |
|---------|--------------------------|--------------------------|--------------------------|--------------------------|
| Mn1-Mn2 | 2.803                    | 2.752                    | 2.812                    | 2.755                    |
| Mn1-Mn3 | 3.399                    | 2.889                    | 3.400                    | 2.879                    |
| Mn1-Mn4 | 5.066                    | 5.017                    | 5.092                    | 5.046                    |
| Mn2-Mn3 | 2.798                    | 2.765                    | 2.784                    | 2.756                    |
| Mn2-Mn4 | 5.237                    | 5.600                    | 5.207                    | 5.574                    |
| Mn3-Mn4 | 2.756                    | 3.133                    | 2.738                    | 3.116                    |
| Mn1-Ca  | 3.698                    | 3.477                    | 3.698                    | 3.475                    |
| Mn2-Ca  | 3.419                    | 3.478                    | 3.428                    | 3.484                    |
| Mn3-Ca  | 3.562                    | 3.518                    | 3.564                    | 3.512                    |
| Mn4-Ca  | 4.000                    | 4.197                    | 3.983                    | 4.188                    |
| Mn1-O1  | 1.868                    | 1.849                    | 1.869                    | 1.847                    |
| Mn1-O3  | 1.938                    | 1.892                    | 1.951                    | 1.895                    |
| Mn1-O5  | 3.239                    | 1.866                    | 3.277                    | 1.873                    |
| Mn2-O1  | 1.868                    | 1.857                    | 1.866                    | 1.858                    |
| Mn2-O2  | 1.825                    | 1.818                    | 1.835                    | 1.822                    |
| Mn2-O3  | 1.922                    | 1.916                    | 1.933                    | 1.924                    |
| Mn3-O2  | 1.843                    | 1.843                    | 1.830                    | 1.837                    |
| Mn3-O3  | 2.009                    | 1.973                    | 1.973                    | 1.951                    |
| Mn3-O4  | 1.814                    | 1.805                    | 1.850                    | 1.830                    |
| Mn3-O5  | 1.850                    | 1.895                    | 1.858                    | 1.887                    |
| Mn4-O4  | 1.902                    | 1.871                    | 1.824                    | 1.815                    |
| Mn4-O5  | 1.874                    | 3.169                    | 1.862                    | 3.195                    |
| Mn4-W1  | 2.036                    | 2.141                    | 1.999                    | 2.115                    |
| Mn4-W2  | 1.847                    | 1.859                    | 1.989                    | 1.983                    |
| Ca-O1   | 2.495                    | 2.509                    | 2.495                    | 2.511                    |
| Ca-O2   | 2.597                    | 2.586                    | 2.604                    | 2.586                    |
| Ca-O5   | 2.722                    | 2.728                    | 2.712                    | 2.720                    |



|         | <b>S<sub>3</sub>H-1</b> | <b>S<sub>3</sub>H-2</b> | <b>S<sub>3</sub>H-3</b> | <b>S<sub>3</sub>H-4</b> | <b>S<sub>3</sub>H-5</b> |
|---------|-------------------------|-------------------------|-------------------------|-------------------------|-------------------------|
| Mn1-Mn2 | 2.805                   | 2.785                   | 2.745                   | 2.749                   | 2.748                   |
| Mn1-Mn3 | 3.525                   | 3.526                   | 2.929                   | 2.913                   | 2.901                   |
| Mn1-Mn4 | 5.278                   | 5.370                   | 5.257                   | 5.213                   | 5.367                   |
| Mn2-Mn3 | 2.822                   | 2.880                   | 2.775                   | 2.767                   | 2.775                   |
| Mn2-Mn4 | 5.322                   | 5.370                   | 5.785                   | 5.637                   | 5.778                   |
| Mn3-Mn4 | 2.806                   | 2.786                   | 3.325                   | 3.222                   | 3.252                   |
| Mn1-Ca  | 3.575                   | 3.480                   | 3.544                   | 3.516                   | 3.494                   |
| Mn2-Ca  | 3.405                   | 3.353                   | 3.503                   | 3.568                   | 3.519                   |
| Mn3-Ca  | 3.624                   | 3.417                   | 3.522                   | 3.457                   | 3.523                   |
| Mn4-Ca  | 4.173                   | 3.999                   | 4.276                   | 3.994                   | 4.487                   |
| Mn1-O1  | 1.881                   | 1.870                   | 1.847                   | 1.852                   | 1.850                   |
| Mn1-O3  | 1.946                   | 1.930                   | 1.901                   | 1.912                   | 1.896                   |
| Mn1-O5  | 3.481                   | 3.587                   | 1.848                   | 1.814                   | 1.874                   |
| Mn2-O1  | 1.829                   | 1.834                   | 1.856                   | 1.848                   | 1.851                   |
| Mn2-O2  | 1.833                   | 1.842                   | 1.812                   | 1.820                   | 1.822                   |
| Mn2-O3  | 1.927                   | 1.920                   | 1.914                   | 1.911                   | 1.920                   |
| Mn3-O2  | 1.834                   | 1.867                   | 1.846                   | 1.846                   | 1.853                   |
| Mn3-O3  | 2.053                   | 2.079                   | 1.993                   | 1.983                   | 1.967                   |
| Mn3-O4  | 1.820                   | 1.820                   | 1.790                   | 1.817                   | 1.805                   |
| Mn3-O5  | 1.859                   | 1.824                   | 1.899                   | 1.885                   | 1.905                   |
| Mn4-O4  | 1.925                   | 1.933                   | 1.936                   | 1.873                   | 1.822                   |
| Mn4-O5  | 1.851                   | 1.825                   | 3.420                   | 3.411                   | 3.538                   |
| Mn4-W1  | 1.991                   | 2.012                   | 2.102                   | 2.020                   | 1.799                   |
| Mn4-W2  | 1.844                   | 1.850                   | 1.891                   | 1.883                   | 1.792                   |
| Ca-O1   | 2.469                   | 2.534                   | 2.562                   | 2.613                   | 2.548                   |
| Ca-O2   | 2.661                   | 2.503                   | 2.581                   | 2.602                   | 2.595                   |
| Ca-O5   | 2.764                   | 2.596                   | 2.762                   | 2.721                   | 2.700                   |

|         | <b>S<sub>1</sub>H-1a</b> | <b>S<sub>1</sub>H-1b</b> | <b>S<sub>1</sub>H-2</b> | <b>S<sub>1</sub>H-3a</b> | <b>S<sub>1</sub>H-3b</b> |
|---------|--------------------------|--------------------------|-------------------------|--------------------------|--------------------------|
| Mn1-Mn2 | 2.793                    | 2.863                    | 2.799                   | 2.833                    | 2.815                    |
| Mn1-Mn3 | 3.338                    | 3.342                    | 3.341                   | 3.206                    | 3.255                    |
| Mn1-Mn4 | 5.037                    | 5.071                    | 5.012                   | 5.600                    | 5.297                    |
| Mn2-Mn3 | 2.803                    | 2.937                    | 2.789                   | 2.777                    | 2.789                    |
| Mn2-Mn4 | 5.189                    | 5.376                    | 5.154                   | 5.726                    | 5.554                    |
| Mn3-Mn4 | 2.762                    | 2.762                    | 2.747                   | 3.163                    | 3.053                    |
| Mn1-Ca  | 3.708                    | 3.666                    | 3.716                   | 3.634                    | 3.664                    |
| Mn2-Ca  | 3.416                    | 3.400                    | 3.417                   | 3.453                    | 3.470                    |
| Mn3-Ca  | 3.546                    | 3.522                    | 3.566                   | 3.490                    | 3.590                    |
| Mn4-Ca  | 3.845                    | 4.019                    | 3.835                   | 4.523                    | 4.272                    |
| Mn1-O1  | 1.862                    | 1.854                    | 1.864                   | 1.886                    | 1.880                    |
| Mn1-O3  | 1.916                    | 1.884                    | 1.924                   | 1.968                    | 1.968                    |
| Mn1-O5  | 3.106                    | 3.272                    | 3.120                   | 2.463                    | 2.535                    |
| Mn2-O1  | 1.877                    | 1.889                    | 1.874                   | 1.859                    | 1.854                    |
| Mn2-O2  | 1.798                    | 1.905                    | 1.805                   | 1.824                    | 1.841                    |
| Mn2-O3  | 1.916                    | 2.294                    | 1.924                   | 1.915                    | 1.911                    |
| Mn3-O2  | 1.879                    | 1.823                    | 1.868                   | 1.837                    | 1.828                    |
| Mn3-O3  | 2.020                    | 1.936                    | 1.991                   | 1.970                    | 1.984                    |
| Mn3-O4  | 1.801                    | 1.860                    | 1.824                   | 1.820                    | 1.814                    |
| Mn3-O5  | 1.823                    | 1.867                    | 1.836                   | 1.880                    | 1.951                    |
| Mn4-O4  | 1.906                    | 1.873                    | 1.863                   | 1.844                    | 1.883                    |
| Mn4-O5  | 1.969                    | 1.844                    | 1.928                   | 3.213                    | 2.820                    |
| Mn4-W1  | 2.069                    | 2.069                    | 2.061                   | 2.037                    | 2.129                    |
| Mn4-W2  | 1.881                    | 1.882                    | 2.019                   | 2.019                    | 1.862                    |
| Ca-O1   | 2.508                    | 2.480                    | 2.505                   | 2.552                    | 2.549                    |
| Ca-O2   | 2.607                    | 2.495                    | 2.608                   | 2.586                    | 2.611                    |
| Ca-O5   | 2.600                    | 2.756                    | 2.626                   | 2.564                    | 2.597                    |

|         | <b>S<sub>0</sub>H-1a</b> | <b>S<sub>0</sub>H-1b</b> | <b>S<sub>0</sub>H-1c</b> | <b>S<sub>0</sub>H-2</b> | <b>S<sub>0</sub>H-3a</b> | <b>S<sub>0</sub>H-3b</b> | <b>S<sub>0</sub>H-3c</b> |
|---------|--------------------------|--------------------------|--------------------------|-------------------------|--------------------------|--------------------------|--------------------------|
|         | <b>S<sub>2</sub>L-1a</b> | <b>S<sub>2</sub>L-1b</b> | <b>S<sub>2</sub>L-1c</b> | <b>S<sub>2</sub>L-2</b> | <b>S<sub>2</sub>L-3a</b> | <b>S<sub>2</sub>L-3b</b> | <b>S<sub>2</sub>L-3c</b> |
| Mn1-Mn2 | 2.789                    | 2.869                    | 2.794                    | 2.904                   | 2.763                    | 2.895                    | 2.857                    |
| Mn1-Mn3 | 3.372                    | 3.339                    | 3.174                    | 3.386                   | 3.610                    | 3.277                    | 2.834                    |
| Mn1-Mn4 | 5.192                    | 5.241                    | 5.058                    | 5.062                   | 5.297                    | 5.096                    | 5.125                    |
| Mn2-Mn3 | 2.810                    | 2.898                    | 2.806                    | 2.955                   | 2.902                    | 2.901                    | 2.842                    |
| Mn2-Mn4 | 5.288                    | 5.449                    | 5.488                    | 5.288                   | 5.366                    | 5.354                    | 5.824                    |
| Mn3-Mn4 | 2.961                    | 2.931                    | 3.032                    | 2.741                   | 2.859                    | 2.865                    | 3.412                    |
| Mn1-Ca  | 3.778                    | 3.732                    | 3.451                    | 3.720                   | 3.787                    | 3.710                    | 3.498                    |
| Mn2-Ca  | 3.435                    | 3.392                    | 3.413                    | 3.395                   | 3.396                    | 3.382                    | 3.410                    |
| Mn3-Ca  | 3.723                    | 3.587                    | 3.588                    | 3.532                   | 3.529                    | 3.524                    | 3.553                    |
| Mn4-Ca  | 3.948                    | 4.075                    | 4.150                    | 3.831                   | 3.911                    | 3.885                    | 4.224                    |
| Mn1-O1  | 1.858                    | 1.850                    | 1.878                    | 1.841                   | 1.870                    | 1.850                    | 1.845                    |
| Mn1-O3  | 1.906                    | 1.886                    | 1.926                    | 1.923                   | 1.888                    | 1.884                    | 1.873                    |
| Mn1-O5  | 3.367                    | 3.152                    | 2.250                    | 3.188                   | 3.511                    | 3.233                    | 1.871                    |
| Mn2-O1  | 1.885                    | 1.895                    | 1.861                    | 1.915                   | 1.870                    | 1.905                    | 1.895                    |
| Mn2-O2  | 1.788                    | 1.878                    | 1.820                    | 1.869                   | 1.791                    | 1.869                    | 1.870                    |
| Mn2-O3  | 1.926                    | 2.324                    | 1.908                    | 2.302                   | 1.893                    | 2.351                    | 2.249                    |
| Mn3-O2  | 1.916                    | 1.807                    | 1.879                    | 1.858                   | 1.888                    | 1.823                    | 1.822                    |
| Mn3-O3  | 2.020                    | 1.925                    | 2.001                    | 1.977                   | 2.330                    | 1.866                    | 1.886                    |
| Mn3-O4  | 1.828                    | 1.844                    | 1.861                    | 1.838                   | 2.087                    | 1.969                    | 1.943                    |
| Mn3-O5  | 2.381                    | 1.991                    | 2.285                    | 1.840                   | 1.862                    | 1.842                    | 1.901                    |
| Mn4-O4  | 1.871                    | 1.875                    | 1.845                    | 1.866                   | 1.962                    | 1.994                    | 2.109                    |
| Mn4-O5  | 2.002                    | 2.161                    | 2.917                    | 1.898                   | 1.866                    | 1.897                    | 3.261                    |
| Mn4-W1  | 2.053                    | 2.100                    | 2.177                    | 2.097                   | 2.069                    | 2.084                    | 2.166                    |
| Mn4-W2  | 1.892                    | 1.871                    | 1.894                    | 2.041                   | 1.885                    | 1.862                    | 1.945                    |
| Ca-O1   | 2.518                    | 2.489                    | 2.459                    | 2.501                   | 2.514                    | 2.485                    | 2.475                    |
| Ca-O2   | 2.648                    | 2.558                    | 2.617                    | 2.499                   | 2.566                    | 2.545                    | 2.542                    |
| Ca-O5   | 2.494                    | 2.613                    | 2.491                    | 2.673                   | 2.542                    | 2.654                    | 2.763                    |

|         | <b>S<sub>0</sub>H-4a</b> | <b>S<sub>0</sub>H-4b</b> | <b>S<sub>0</sub>H-5a</b> | <b>S<sub>0</sub>H-5b</b> |                         |                         |
|---------|--------------------------|--------------------------|--------------------------|--------------------------|-------------------------|-------------------------|
|         | <b>S<sub>2</sub>L-4a</b> | <b>S<sub>2</sub>L-4b</b> | <b>S<sub>2</sub>L-5a</b> | <b>S<sub>2</sub>L-5b</b> | <b>S<sub>2</sub>L-6</b> | <b>S<sub>2</sub>L-7</b> |
| Mn1-Mn2 | 2.771                    | 2.885                    | 2.797                    | 2.872                    | 2.794                   | 2.782                   |
| Mn1-Mn3 | 3.588                    | 3.326                    | 3.380                    | 3.329                    | 3.381                   | 3.425                   |
| Mn1-Mn4 | 5.230                    | 5.057                    | 5.156                    | 5.307                    | 5.304                   | 5.286                   |
| Mn2-Mn3 | 2.864                    | 2.926                    | 2.796                    | 2.911                    | 2.819                   | 2.806                   |
| Mn2-Mn4 | 5.301                    | 5.417                    | 5.251                    | 5.510                    | 5.538                   | 5.416                   |
| Mn3-Mn4 | 2.865                    | 2.872                    | 2.935                    | 2.944                    | 3.119                   | 3.152                   |
| Mn1-Ca  | 3.769                    | 3.703                    | 3.761                    | 3.714                    | 3.773                   | 3.824                   |
| Mn2-Ca  | 3.390                    | 3.388                    | 3.430                    | 3.415                    | 3.377                   | 3.499                   |
| Mn3-Ca  | 3.549                    | 3.500                    | 3.695                    | 3.539                    | 3.827                   | 3.827                   |
| Mn4-Ca  | 3.846                    | 3.925                    | 3.896                    | 4.104                    | 4.447                   | 4.006                   |
| Mn1-O1  | 1.872                    | 1.853                    | 1.859                    | 1.850                    | 1.877                   | 1.859                   |
| Mn1-O3  | 1.896                    | 1.887                    | 1.916                    | 1.901                    | 1.926                   | 1.932                   |
| Mn1-O5  | 3.464                    | 3.272                    | 3.310                    | 3.112                    | 2.640                   | 3.485                   |
| Mn2-O1  | 1.869                    | 1.894                    | 1.884                    | 1.886                    | 1.864                   | 1.873                   |
| Mn2-O2  | 1.800                    | 1.888                    | 1.799                    | 1.899                    | 1.833                   | 1.812                   |
| Mn2-O3  | 1.898                    | 2.357                    | 1.933                    | 2.330                    | 1.925                   | 1.943                   |
| Mn3-O2  | 1.875                    | 1.824                    | 1.895                    | 1.814                    | 1.876                   | 1.872                   |
| Mn3-O3  | 2.264                    | 1.881                    | 2.003                    | 1.895                    | 2.017                   | 1.993                   |
| Mn3-O4  | 2.138                    | 1.924                    | 1.853                    | 1.881                    | 1.839                   | 1.943                   |
| Mn3-O5  | 1.887                    | 1.859                    | 2.362                    | 1.962                    | 2.839                   | 2.484                   |
| Mn4-O4  | 1.957                    | 2.155                    | 1.819                    | 1.821                    | 1.857                   | 1.987                   |
| Mn4-O5  | 1.825                    | 1.835                    | 2.003                    | 2.263                    | 2.991                   | 1.955                   |
| Mn4-W1  | 2.061                    | 2.031                    | 2.051                    | 2.178                    | 2.116                   | 2.027                   |
| Mn4-W2  | 2.036                    | 2.178                    | 2.009                    | 2.012                    | 1.877                   | 1.840                   |
| Ca-O1   | 2.498                    | 2.486                    | 2.513                    | 2.513                    | 2.474                   | 2.548                   |
| Ca-O2   | 2.570                    | 2.507                    | 2.630                    | 2.513                    | 2.573                   | 2.722                   |
| Ca-O5   | 2.567                    | 2.669                    | 2.493                    | 2.608                    | 3.089                   | 2.540                   |

|         | <b>S<sub>3</sub>L-1</b> | <b>S<sub>3</sub>L-2</b> | <b>S<sub>3</sub>L-3</b> | <b>S<sub>3</sub>L-4</b> | <b>S<sub>3</sub>L-5</b> | <b>S<sub>3</sub>L-6</b> | <b>S<sub>3</sub>L-7</b> |
|---------|-------------------------|-------------------------|-------------------------|-------------------------|-------------------------|-------------------------|-------------------------|
| Mn1-Mn2 | 2.803                   | 2.794                   | 2.907                   | 2.781                   | 2.784                   | 2.754                   | 2.776                   |
| Mn1-Mn3 | 3.447                   | 3.382                   | 3.408                   | 3.174                   | 3.669                   | 3.039                   | 3.750                   |
| Mn1-Mn4 | 5.224                   | 5.322                   | 5.266                   | 5.384                   | 5.433                   | 5.620                   | 5.406                   |
| Mn2-Mn3 | 2.849                   | 2.806                   | 2.928                   | 2.812                   | 2.912                   | 2.864                   | 2.938                   |
| Mn2-Mn4 | 5.270                   | 5.391                   | 5.413                   | 5.579                   | 5.455                   | 5.682                   | 5.443                   |
| Mn3-Mn4 | 2.803                   | 3.143                   | 2.878                   | 3.278                   | 2.921                   | 3.240                   | 2.904                   |
| Mn1-Ca  | 3.801                   | 3.899                   | 3.864                   | 3.853                   | 3.714                   | 3.619                   | 3.726                   |
| Mn2-Ca  | 3.389                   | 3.476                   | 3.338                   | 3.549                   | 3.398                   | 3.455                   | 3.404                   |
| Mn3-Ca  | 3.559                   | 3.894                   | 3.568                   | 3.759                   | 3.569                   | 3.448                   | 3.589                   |
| Mn4-Ca  | 3.918                   | 4.088                   | 4.041                   | 4.050                   | 4.040                   | 4.153                   | 4.028                   |
| Mn1-O1  | 1.891                   | 1.863                   | 1.849                   | 1.860                   | 1.877                   | 1.875                   | 1.876                   |
| Mn1-O3  | 1.932                   | 1.927                   | 1.842                   | 2.031                   | 1.896                   | 1.897                   | 1.892                   |
| Mn1-O5  | 3.355                   | 1.778                   | 3.391                   | 2.098                   | 3.646                   | 1.752                   | 3.638                   |
| Mn2-O1  | 1.856                   | 1.863                   | 1.914                   | 1.854                   | 1.847                   | 1.849                   | 1.845                   |
| Mn2-O2  | 1.827                   | 1.797                   | 1.844                   | 1.828                   | 1.800                   | 1.831                   | 1.799                   |
| Mn2-O3  | 1.917                   | 1.903                   | 2.366                   | 1.872                   | 1.889                   | 1.876                   | 1.881                   |
| Mn3-O2  | 1.882                   | 1.900                   | 1.835                   | 1.896                   | 1.865                   | 1.858                   | 1.866                   |
| Mn3-O3  | 2.041                   | 2.050                   | 1.979                   | 2.015                   | 2.379                   | 2.164                   | 2.456                   |
| Mn3-O4  | 1.802                   | 1.823                   | 1.828                   | 1.799                   | 2.096                   | 2.040                   | 2.078                   |
| Mn3-O5  | 1.841                   | 3.047                   | 1.923                   | 1.885                   | 1.887                   | 2.079                   | 1.883                   |
| Mn4-O4  | 1.934                   | 1.875                   | 1.917                   | 1.913                   | 1.960                   | 2.000                   | 1.962                   |
| Mn4-O5  | 1.926                   | 3.935                   | 1.964                   | 3.344                   | 1.877                   | 3.959                   | 1.872                   |
| Mn4-W1  | 2.023                   | 2.009                   | 2.006                   | 2.021                   | 2.062                   | 2.001                   | 2.045                   |
| Mn4-W2  | 1.882                   | 1.906                   | 1.874                   | 1.902                   | 1.875                   | 1.875                   | 1.877                   |
| Ca-O1   | 2.533                   | 2.601                   | 2.546                   | 2.693                   | 2.525                   | 2.579                   | 2.526                   |
| Ca-O2   | 2.548                   | 2.655                   | 2.525                   | 2.569                   | 2.584                   | 2.527                   | 2.607                   |
| Ca-O5   | 2.596                   | 3.507                   | 2.629                   | 3.303                   | 2.574                   | 2.882                   | 2.567                   |

|         | <b>S<sub>1</sub>L-1</b> | <b>S<sub>1</sub>L-2</b> | <b>S<sub>1</sub>L-3a</b> | <b>S<sub>1</sub>L-3b</b> | <b>S<sub>1</sub>L-4</b> | <b>S<sub>1</sub>L-5</b> | <b>S<sub>1</sub>L-6</b> | <b>S<sub>1</sub>L-7a</b> | <b>S<sub>1</sub>L-7b</b> |
|---------|-------------------------|-------------------------|--------------------------|--------------------------|-------------------------|-------------------------|-------------------------|--------------------------|--------------------------|
| Mn1-Mn2 | 2.901                   | 2.917                   | 2.924                    | 2.881                    | 2.908                   | 2.904                   | 2.892                   | 2.908                    | 2.886                    |
| Mn1-Mn3 | 3.467                   | 3.126                   | 3.254                    | 3.065                    | 3.253                   | 3.252                   | 3.495                   | 3.494                    | 3.205                    |
| Mn1-Mn4 | 5.259                   | 4.633                   | 4.959                    | 5.243                    | 4.824                   | 5.463                   | 5.316                   | 5.306                    | 5.606                    |
| Mn2-Mn3 | 2.981                   | 2.946                   | 2.911                    | 2.922                    | 2.954                   | 2.940                   | 2.967                   | 2.930                    | 2.879                    |
| Mn2-Mn4 | 5.436                   | 5.351                   | 5.497                    | 5.835                    | 5.443                   | 5.788                   | 5.587                   | 5.505                    | 5.782                    |
| Mn3-Mn4 | 2.961                   | 2.832                   | 3.029                    | 3.365                    | 2.989                   | 3.210                   | 3.084                   | 3.144                    | 3.397                    |
| Mn1-Ca  | 3.782                   | 3.485                   | 3.630                    | 3.374                    | 3.634                   | 3.615                   | 3.698                   | 3.825                    | 3.664                    |
| Mn2-Ca  | 3.408                   | 3.381                   | 3.366                    | 3.379                    | 3.371                   | 3.415                   | 3.379                   | 3.396                    | 3.404                    |
| Mn3-Ca  | 3.658                   | 3.432                   | 3.441                    | 3.568                    | 3.464                   | 3.520                   | 3.749                   | 3.736                    | 3.573                    |
| Mn4-Ca  | 3.920                   | 3.723                   | 3.821                    | 4.235                    | 3.726                   | 4.253                   | 4.228                   | 3.983                    | 4.167                    |
| Mn1-O1  | 1.838                   | 1.848                   | 1.842                    | 1.872                    | 1.847                   | 1.856                   | 1.844                   | 1.840                    | 1.859                    |
| Mn1-O3  | 1.913                   | 1.922                   | 1.921                    | 1.903                    | 1.932                   | 1.937                   | 1.940                   | 1.934                    | 1.906                    |
| Mn1-O5  | 3.420                   | 2.458                   | 2.884                    | 1.753                    | 2.793                   | 2.497                   | 2.701                   | 3.510                    | 2.792                    |
| Mn2-O1  | 1.922                   | 1.934                   | 1.931                    | 1.885                    | 1.910                   | 1.905                   | 1.890                   | 1.918                    | 1.890                    |
| Mn2-O2  | 1.864                   | 1.857                   | 1.846                    | 1.893                    | 1.879                   | 1.888                   | 1.904                   | 1.858                    | 1.901                    |
| Mn2-O3  | 2.327                   | 2.220                   | 2.290                    | 2.238                    | 2.295                   | 2.237                   | 2.338                   | 2.374                    | 2.290                    |
| Mn3-O2  | 1.893                   | 1.878                   | 1.848                    | 1.833                    | 1.866                   | 1.837                   | 1.847                   | 1.831                    | 1.803                    |
| Mn3-O3  | 2.016                   | 2.004                   | 1.943                    | 1.980                    | 1.935                   | 1.993                   | 1.996                   | 1.984                    | 1.876                    |
| Mn3-O4  | 1.848                   | 1.785                   | 1.899                    | 1.963                    | 1.907                   | 1.794                   | 1.864                   | 1.980                    | 1.958                    |
| Mn3-O5  | 2.385                   | 1.814                   | 1.788                    | 2.369                    | 1.787                   | 1.959                   | 3.271                   | 2.461                    | 1.909                    |
| Mn4-O4  | 1.866                   | 2.093                   | 2.338                    | 2.149                    | 2.338                   | 1.980                   | 1.840                   | 1.977                    | 2.066                    |
| Mn4-O5  | 1.995                   | 2.197                   | 2.123                    | 3.561                    | 2.080                   | 3.002                   | 3.258                   | 1.936                    | 2.829                    |
| Mn4-W1  | 2.100                   | 2.340                   | 2.299                    | 2.190                    | 2.244                   | 2.116                   | 2.150                   | 2.036                    | 2.162                    |
| Mn4-W2  | 1.906                   | 2.234                   | 2.013                    | 1.979                    | 2.161                   | 2.149                   | 1.921                   | 1.853                    | 1.930                    |
| Ca-O1   | 2.525                   | 2.454                   | 2.469                    | 2.427                    | 2.473                   | 2.509                   | 2.483                   | 2.503                    | 2.487                    |
| Ca-O2   | 2.525                   | 2.472                   | 2.520                    | 2.556                    | 2.505                   | 2.490                   | 2.501                   | 2.591                    | 2.556                    |
| Ca-O5   | 2.504                   | 2.568                   | 2.557                    | 2.598                    | 2.571                   | 2.563                   | 2.610                   | 2.543                    | 2.593                    |

|         | <b>S<sub>0</sub>L-1</b> | <b>S<sub>0</sub>L-2</b> | <b>S<sub>0</sub>L-3</b> | <b>S<sub>0</sub>L-4</b> | <b>S<sub>0</sub>L-5</b> | <b>S<sub>0</sub>L-6</b> |
|---------|-------------------------|-------------------------|-------------------------|-------------------------|-------------------------|-------------------------|
| Mn1-Mn2 | 2.908                   | 2.904                   | 2.895                   | 2.897                   | 2.897                   | 2.900                   |
| Mn1-Mn3 | 3.338                   | 3.437                   | 3.489                   | 3.503                   | 3.525                   | 3.431                   |
| Mn1-Mn4 | 5.054                   | 5.224                   | 5.447                   | 5.460                   | 5.498                   | 5.222                   |
| Mn2-Mn3 | 2.974                   | 2.950                   | 2.978                   | 2.972                   | 2.942                   | 2.973                   |
| Mn2-Mn4 | 5.434                   | 5.569                   | 5.655                   | 5.658                   | 5.788                   | 5.528                   |
| Mn3-Mn4 | 2.939                   | 3.168                   | 3.190                   | 3.180                   | 3.500                   | 3.115                   |
| Mn1-Ca  | 3.598                   | 3.731                   | 3.685                   | 3.710                   | 3.709                   | 3.769                   |
| Mn2-Ca  | 3.395                   | 3.410                   | 3.378                   | 3.375                   | 3.354                   | 3.396                   |
| Mn3-Ca  | 3.565                   | 3.658                   | 3.775                   | 3.729                   | 3.843                   | 3.627                   |
| Mn4-Ca  | 3.850                   | 3.937                   | 4.239                   | 4.211                   | 4.235                   | 3.865                   |
| Mn1-O1  | 1.842                   | 1.838                   | 1.843                   | 1.842                   | 1.856                   | 1.846                   |
| Mn1-O3  | 1.902                   | 1.924                   | 1.930                   | 1.929                   | 1.972                   | 1.921                   |
| Mn1-O5  | 2.808                   | 3.137                   | 2.607                   | 2.576                   | 2.455                   | 3.166                   |
| Mn2-O1  | 1.935                   | 1.928                   | 1.902                   | 1.901                   | 1.885                   | 1.909                   |
| Mn2-O2  | 1.853                   | 1.849                   | 1.878                   | 1.884                   | 1.906                   | 1.885                   |
| Mn2-O3  | 2.278                   | 2.334                   | 2.305                   | 2.328                   | 2.347                   | 2.338                   |
| Mn3-O2  | 1.909                   | 1.856                   | 1.895                   | 1.879                   | 1.826                   | 1.871                   |
| Mn3-O3  | 2.016                   | 2.012                   | 2.026                   | 2.019                   | 1.987                   | 1.989                   |
| Mn3-O4  | 1.821                   | 1.933                   | 1.815                   | 1.826                   | 1.953                   | 1.944                   |
| Mn3-O5  | 2.270                   | 2.308                   | 3.272                   | 3.282                   | 3.056                   | 2.256                   |
| Mn4-O4  | 2.017                   | 2.223                   | 1.979                   | 1.960                   | 2.069                   | 2.225                   |
| Mn4-O5  | 2.340                   | 2.175                   | 3.446                   | 3.495                   | 3.297                   | 2.132                   |
| Mn4-W1  | 2.277                   | 2.284                   | 2.148                   | 2.111                   | 2.161                   | 2.202                   |
| Mn4-W2  | 2.256                   | 2.019                   | 2.058                   | 2.223                   | 1.920                   | 2.162                   |
| Ca-O1   | 2.479                   | 2.493                   | 2.503                   | 2.512                   | 2.469                   | 2.511                   |
| Ca-O2   | 2.502                   | 2.613                   | 2.487                   | 2.463                   | 2.535                   | 2.551                   |
| Ca-O5   | 2.445                   | 2.459                   | 2.592                   | 2.617                   | 2.814                   | 2.466                   |

**Part V. Mulliken spin populations for the Mn ions of the inorganic core**

|                                              | <b>Mn1</b> | <b>Mn2</b> | <b>Mn3</b> | <b>Mn4</b> |
|----------------------------------------------|------------|------------|------------|------------|
| <b>S<sub>2</sub>H-1a</b>                     | 3.88       | 2.92       | 2.85       | 2.87       |
| <b>S<sub>2</sub>H-1b</b>                     | 2.89       | 2.83       | 2.84       | 3.84       |
| <b>S<sub>2</sub>H-2a</b>                     | 3.88       | 2.92       | 2.87       | 2.89       |
| <b>S<sub>2</sub>H-2b</b>                     | 2.89       | 2.83       | 2.86       | 3.86       |
| <b>S<sub>2</sub>H-3</b>                      | 3.86       | 2.92       | 2.85       | 2.87       |
| <b>S<sub>3</sub>H-1</b>                      | 2.84       | 2.89       | 2.85       | 2.87       |
| <b>S<sub>3</sub>H-2</b>                      | 2.85       | 2.89       | 2.84       | 2.88       |
| <b>S<sub>3</sub>H-3</b>                      | 2.88       | 2.83       | 2.79       | 2.86       |
| <b>S<sub>3</sub>H-4</b>                      | 2.87       | 2.84       | 2.84       | 2.83       |
| <b>S<sub>3</sub>H-5</b>                      | 2.88       | 2.84       | 2.87       | 2.78       |
| <b>S<sub>1</sub>H-1a</b>                     | 3.73       | 2.78       | 2.75       | 3.74       |
| <b>S<sub>1</sub>H-1b</b>                     | 3.87       | 3.87       | 2.89       | 2.86       |
| <b>S<sub>1</sub>H-2</b>                      | 3.89       | 2.89       | 2.88       | 3.90       |
| <b>S<sub>1</sub>H-3a</b>                     | 3.92       | 2.89       | 2.92       | 3.84       |
| <b>S<sub>1</sub>H-3b</b>                     | 3.90       | 2.91       | 2.89       | 3.85       |
| <b>S<sub>0</sub>H-1a / S<sub>2</sub>L-1a</b> | 3.87       | 2.89       | 3.86       | 3.90       |
| <b>S<sub>0</sub>H-1b / S<sub>2</sub>L-1b</b> | 3.86       | 3.86       | 2.91       | 3.88       |
| <b>S<sub>0</sub>H-1c / S<sub>2</sub>L-1c</b> | 3.73       | 2.81       | 3.70       | 3.76       |
| <b>S<sub>0</sub>H-2 / S<sub>2</sub>L-2</b>   | 3.90       | 3.86       | 2.92       | 3.88       |
| <b>S<sub>0</sub>H-3a / S<sub>2</sub>L-3a</b> | 3.90       | 2.91       | 3.85       | 3.87       |
| <b>S<sub>0</sub>H-3b / S<sub>2</sub>L-3b</b> | 3.88       | 3.87       | 2.90       | 3.86       |
| <b>S<sub>0</sub>H-3c / S<sub>2</sub>L-3c</b> | 2.96       | 3.82       | 2.97       | 4.73       |
| <b>S<sub>0</sub>H-4a / S<sub>2</sub>L-4a</b> | 3.90       | 2.91       | 3.87       | 3.88       |
| <b>S<sub>0</sub>H-4b / S<sub>2</sub>L-4b</b> | 3.89       | 3.86       | 2.93       | 3.91       |
| <b>S<sub>0</sub>H-5a / S<sub>2</sub>L-5a</b> | 3.88       | 2.91       | 3.85       | 3.91       |
| <b>S<sub>0</sub>H-5b / S<sub>2</sub>L-5b</b> | 3.87       | 3.86       | 2.93       | 3.89       |
| <b>S<sub>2</sub>L-6</b>                      | 3.90       | 2.94       | 3.83       | 3.88       |
| <b>S<sub>2</sub>L-7</b>                      | 3.86       | 2.92       | 3.91       | 3.89       |
| <b>S<sub>3</sub>L-1</b>                      | 3.91       | 2.92       | 2.86       | 3.87       |
| <b>S<sub>3</sub>L-2</b>                      | 2.84       | 2.89       | 3.86       | 3.91       |
| <b>S<sub>3</sub>L-3</b>                      | 2.90       | 3.82       | 2.92       | 3.88       |
| <b>S<sub>3</sub>L-4</b>                      | 3.81       | 2.89       | 2.94       | 3.90       |
| <b>S<sub>3</sub>L-5</b>                      | 2.86       | 2.89       | 3.86       | 3.87       |
| <b>S<sub>3</sub>L-6</b>                      | 2.80       | 2.88       | 3.92       | 3.88       |
| <b>S<sub>3</sub>L-7</b>                      | 2.86       | 2.89       | 3.87       | 3.87       |
| <b>S<sub>3</sub>L-8</b>                      | 3.91       | 2.91       | 2.89       | 3.88       |
| <b>S<sub>3</sub>L-9</b>                      | 3.87       | 2.93       | 3.85       | 2.91       |
| <b>S<sub>3</sub>L-10</b>                     | 2.92       | 2.89       | 3.83       | 3.91       |
| <b>S<sub>3</sub>L-11</b>                     | 3.91       | 2.92       | 2.90       | 3.86       |
| <b>S<sub>3</sub>L-12</b>                     | 2.98       | 2.88       | 3.85       | 3.90       |
| <b>S<sub>1</sub>L-1</b>                      | 3.89       | 3.88       | 3.88       | 3.90       |
| <b>S<sub>1</sub>L-2</b>                      | 3.93       | 3.86       | 2.80       | 4.83       |
| <b>S<sub>1</sub>L-3a</b>                     | 3.92       | 3.85       | 2.88       | 4.81       |
| <b>S<sub>1</sub>L-3b</b>                     | 2.77       | 3.86       | 3.90       | 4.84       |



|                          |      |      |      |      |
|--------------------------|------|------|------|------|
| <b>S<sub>1</sub>L-4</b>  | 3.93 | 3.85 | 2.90 | 4.84 |
| <b>S<sub>1</sub>L-5</b>  | 3.92 | 3.86 | 2.95 | 4.79 |
| <b>S<sub>1</sub>L-6</b>  | 3.91 | 3.88 | 3.83 | 3.90 |
| <b>S<sub>1</sub>L-7a</b> | 3.90 | 3.86 | 3.91 | 3.91 |
| <b>S<sub>1</sub>L-7b</b> | 3.91 | 3.87 | 2.96 | 4.79 |
| <hr/>                    |      |      |      |      |
| <b>S<sub>0</sub>L-1</b>  | 3.93 | 3.88 | 3.87 | 4.82 |
| <b>S<sub>0</sub>L-2</b>  | 3.90 | 3.87 | 3.92 | 4.84 |
| <b>S<sub>0</sub>L-3</b>  | 3.92 | 3.89 | 3.92 | 4.77 |
| <b>S<sub>0</sub>L-4</b>  | 3.91 | 3.89 | 3.91 | 4.80 |
| <b>S<sub>0</sub>L-5</b>  | 3.94 | 3.88 | 3.91 | 4.82 |
| <b>S<sub>0</sub>L-6</b>  | 3.92 | 3.87 | 3.92 | 4.86 |

## Part VI. Q-band $^{55}\text{Mn}$ -Davies ENDOR at 2.5 K of the $S_2$ state of the $\text{Mn}_4\text{O}_5\text{Ca}$ cofactor isolated from *T. elongatus*

### Test measurements for a mixed valence $\text{Mn}^{\text{II}}\text{Mn}^{\text{III}}$ model complex with fast $T_1$

**relaxation:** Test measurements were performed on a bis- $\mu$ -pivalato- $\mu$ -hydroxo  $\text{Mn}^{\text{II}}\text{Mn}^{\text{III}}$  model complex (PivOH),<sup>21</sup> see Fig. 4B. It displays  $^{55}\text{Mn}$ -ENDOR resonances across a large spectral range (100–400 MHz), making it an ideal system to check ENDOR performance of the instrument. The spectra measured for the PivOH complex are essentially the same as reported in Cox et al.,<sup>22</sup> measured at 5 K using an Oxford Helium flow cryostat system. Using the new cryogenic closed cycle cryostat system, it was found that the optimal temperature for the  $^{55}\text{Mn}$ -ENDOR measurement was approximately 3.5 K. At this temperature the electronic  $T_1$  relaxation ( $T_1^* = 35 \mu\text{s}$ ,  $T_1 = 46 \mu\text{s}$  Fig. S13B) is sufficiently slow that a near full inversion of the spin echo is maintained during the Davies pulse sequence (ca. 6  $\mu\text{s}$ ), but is sufficiently fast to allow efficient data collection, with repetition rates of the order of one ms. Below this temperature (2.5 K) the ENDOR performance drops owing to a dramatic increase in the  $T_1$  time ( $T_1^* = 610 \mu\text{s}$ ,  $T_1 = 820 \mu\text{s}$ ), slowing the maximum rate of data collection, limiting the number of averages that can be collected in a reasonable time frame (10–20 hours). Importantly, no change was observed for the  $^{55}\text{Mn}$ -ENDOR signal envelope although the electronic  $T_1$  time increased by twentyfold. It is noted that electronic  $T_2$  relaxation is approximately temperature invariant (twofold slower) as expected (Fig. S13A). A second, faster phase seen in  $T_1^*$  decay curves (25–36%) is assigned to sample aggregation. It is also noted that  $T_1$  times as estimated by inversion recovery are similar (within a factor of two), suggesting spectral diffusion does not need to be explicitly considered in this system.<sup>23</sup>

**Calibration of  $B_2$  (RF) field using the PivOH complex:** The  $B_2$  (RF) field was calibrated at a series of RF frequencies through the  $^{55}\text{Mn}$ -ENDOR signal envelope, see Fig. 4A and 4B. The optimal RF  $\pi$  pulse ( $t_{RF}$ ) was estimated by performing an RF nutation experiment at a series of positions through the profile marked in Fig. 4B. Here the ENDOR response is

monitored as a function of the length of the  $t_{RF}$  pulse using the Davies pulse sequence:  $t_{inv}-t_{RF}-T-t_p-t-2t_p-t-echo$ . To eliminate a heating artifact, a background nutation curve measured at position where no  $^{55}\text{Mn}$ -ENDOR resonances appear (185 MHz) was subtracted from the data. It is readily seen that the optimal RF  $\pi$  pulse ( $t_{RF}$ ) was found to be ca. 4  $\mu\text{s}$  at all positions and that no suppression of high frequency transitions ( $> 200$  MHz) is observed. As hyperfine enhancement does not need to be considered in this system, these results require that the  $B_2$  field is linear over the 100–300 MHz range. Above 300 MHz, the  $B_2$  field does begin to fall off, but NMR resonances can still be observed.

#### **$^{55}\text{Mn}$ -ENDOR and $T_1$ decay of the $S_2$ (multiline) state of the $\text{Mn}_4\text{O}_5\text{Ca}$ cofactor at 2.5 K:**

$^{55}\text{Mn}$ -ENDOR spectra were collected for the  $\text{Mn}_4\text{O}_5\text{Ca}$  cofactor poised in the  $S_2$  state at the center field of the multiline signal (Fig. 4C, insert). As mentioned in the main text, the electronic  $T_1$  relaxation ( $T_1^* = 21 \mu\text{s}$ ,  $T_1 = 41 \mu\text{s}$ ) at 5 K is fast enough to allow efficient data collection with repetition rates of the order of 1 ms while slow enough that a near full inversion of the spin echo is maintained during the Davies pulse sequence ( $\approx 6 \mu\text{s}$ ), see Fig. S13D. Figure 4C shows that the  $^{55}\text{Mn}$ -ENDOR signals are only observed over a narrow radio frequency range, in line with a tetramer spin projection model.<sup>24-27</sup>

$^{55}\text{Mn}$ -ENDOR spectra were also collected at 2.5 K, Fig. 4C. Although data collection is more difficult with a  $T_1$  time of at least ca. 2 ms at this temperature,  $^{55}\text{Mn}$ -ENDOR data at a comparable signal to noise ratio could be obtained. As expected, the ENDOR spectrum is essentially identical to that seen at 5 K.

It should be pointed out that here we report only an upper bound estimate for the electronic  $T_1$  of the multiline signal at 2.5 K, since spectral diffusion significantly contributes to the longitudinal (effective  $T_1$ ) relaxation at 2.5 K. This can be readily seen by comparing the inversion recovery and simulated decay traces. For the inversion recovery decay, the major species decays with a time constant of  $T_1 = 27$  ms ( $37 \text{ s}^{-1}$ ), whereas for the simulated three-pulse 2.5 K data the decay of the major species is an order of magnitude faster ( $T_1^* = 1.7$  ms,

590 s<sup>-1</sup>) as this measurement is more susceptible to spectral diffusion. Importantly though, the electronic  $T_1$  estimate as inferred from the simulated decay trace *must* represent an underestimation of the  $T_1$  relaxation rate of the multiline signal and thus is a robust upper bound estimate for its electronic  $T_1$  relaxation.<sup>23</sup> The real value should be closer to the inversion recovery decay estimate i.e.  $T_1 = 27$  ms (37 s<sup>-1</sup>).

Finally, it should also be noted that in both 2.5 K decay traces there is a very fast component not included in the bi-exponential fit. This component decayed completely within 300  $\mu$ s and is tentatively assigned to an underlying contribution from the semiquinone-iron signal ( $Q^{\bullet}Fe^{2+}$ ).

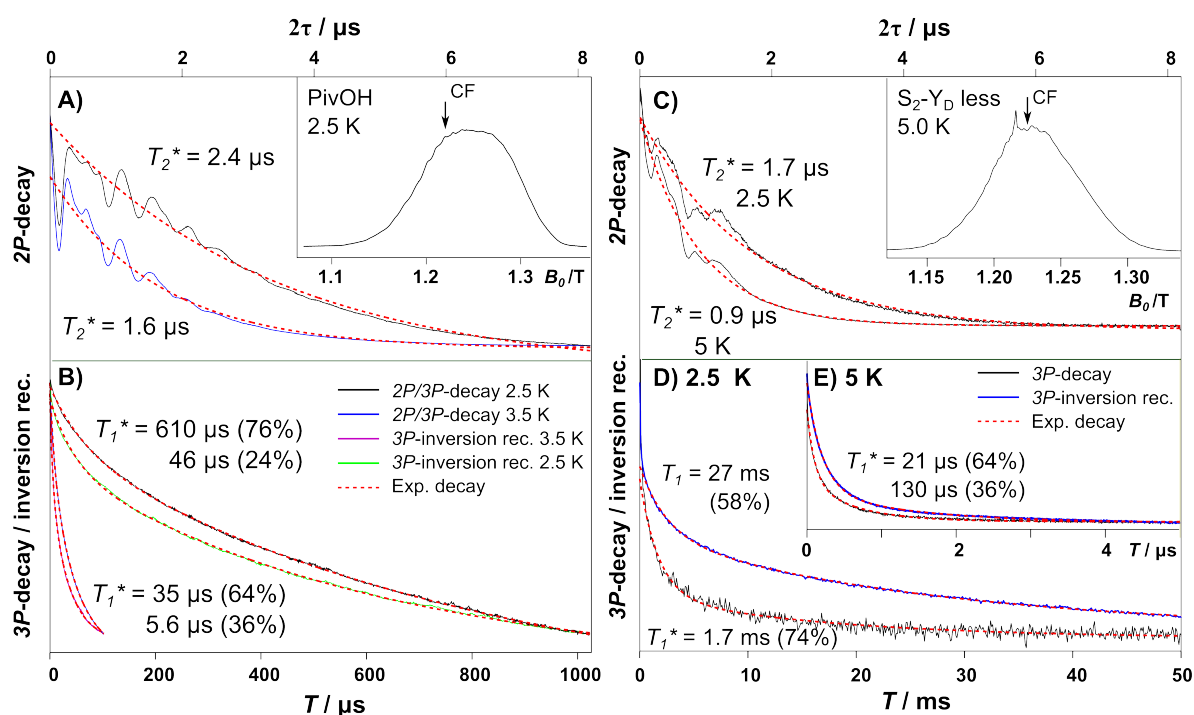

**Figure S13.** Q-band pulse EPR of the PivOH complex and  $S_2$  state at center field (see insert). **A)** The decay of the PivOH signal, measured using a two pulse sequence as a function of the interpulse separation  $\tau$ . **B)** The decay of the PivOH signal, measured using a three pulse sequence as a function of the interpulse separation  $T$ . **C)** The decay of the multiline signal at 2.5 K, measured using a two pulse sequence as a function of the interpulse separation  $\tau$ . **D), E)** The decay of the multiline signal measured using a three pulse sequence as a function of the interpulse separation  $T$ . For details see the materials and methods section in the main text.

## Part VII. Additional analysis of calculated Mn K pre-edge X-ray absorption spectra

A metal K pre-edge spectrum gains intensity through p-d-mixing, therefore distortion from the ideal octahedral symmetry for hexacoordinate metal centers enhances the intensity of the transition. The most intense transitions contributing to the first peak of the calculated spectra are those into the unoccupied molecular orbitals with predominant Mn 3d character, e.g. the local  $\alpha$   $e_g$ -type orbitals for octahedrally coordinated Mn(IV) ions with a  $3d^3$  configuration. For Mn(II), Mn(III) and Mn(IV) with local  $3d^5$ ,  $3d^4$  and  $3d^3$  configurations, respectively, there are five (into five unoccupied  $\beta$  orbitals), six (into one unoccupied  $\alpha$  and five unoccupied  $\beta$  orbitals) and seven (into two unoccupied  $\alpha$  and five unoccupied  $\beta$  orbitals) transitions. The total calculated spectra as shown in the main text, Figure 9, are the sums of the spectra from the individual Mn ions. Deconvolutions into individual contributions are shown and discussed in the following.

From Figure S15 it can be seen that the calculated Mn(II) and Mn(III) spectra start at lower energies than those of Mn(IV) (Mn2 in **S<sub>2</sub>L-6**, Mn2 and Mn3 in **S<sub>3</sub>L-3**), which explains why the maxima in the spectra of the **S<sub>0</sub>L** and **S<sub>1</sub>L** models appear at lower energies than those in the spectra of the **S<sub>2</sub>L** and **S<sub>3</sub>L** models: the spectra of **S<sub>0</sub>L** and **S<sub>1</sub>L** arise exclusively from Mn(II) and Mn(III) contributions at low energies, whereas for **S<sub>2</sub>L** and **S<sub>3</sub>L** the higher energy contributions of the Mn(IV) ions shift the maximum of the total spectrum to higher energy.

The intensity differences arise from differences in the local Mn geometries. For example, it is often observed that square pyramidally coordinated metal centers show higher pre-edge intensities than octahedrally coordinated centers.<sup>28</sup> This explains the intensity difference between the spectra of **S<sub>0</sub>L-3**, where O5 is a loosely coordinated H<sub>2</sub>O molecule, and **S<sub>1</sub>L-1**, where all Mn ions except Mn1 are hexacoordinate.

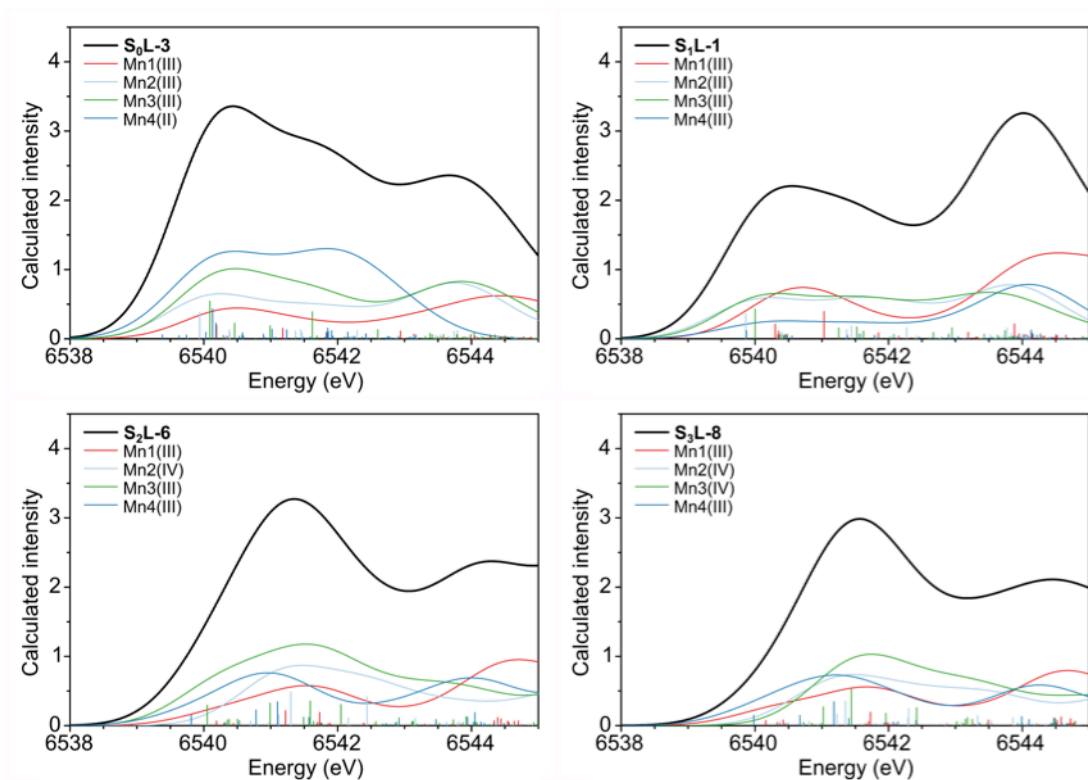

**Figure S14.** Spectra of selected low-valent models with their contributions from the individual Mn ions.

Due to the higher structural consistency within the sequence of models that belong to the high-valent scheme, it is easier to relate spectral changes to changes in electronic and geometric structure. Comparing the development of the individual Mn contributions as the cluster advances in the Kok cycle (Figure S16), it can be seen that the contribution of each Mn center to the total spectrum evolves as expected in each S state transition. For example, the contribution of Mn2, which is present as an octahedrally coordinated Mn(IV) ion in all high-valent S state models (light blue trace in Figure S16), undergoes only minor changes, whereas the oxidation of Mn3 from Mn(III) to Mn(IV) in the  $S_0$  to  $S_1$  transition induces an increase in intensity for its spectral contribution to the total spectrum (green trace).

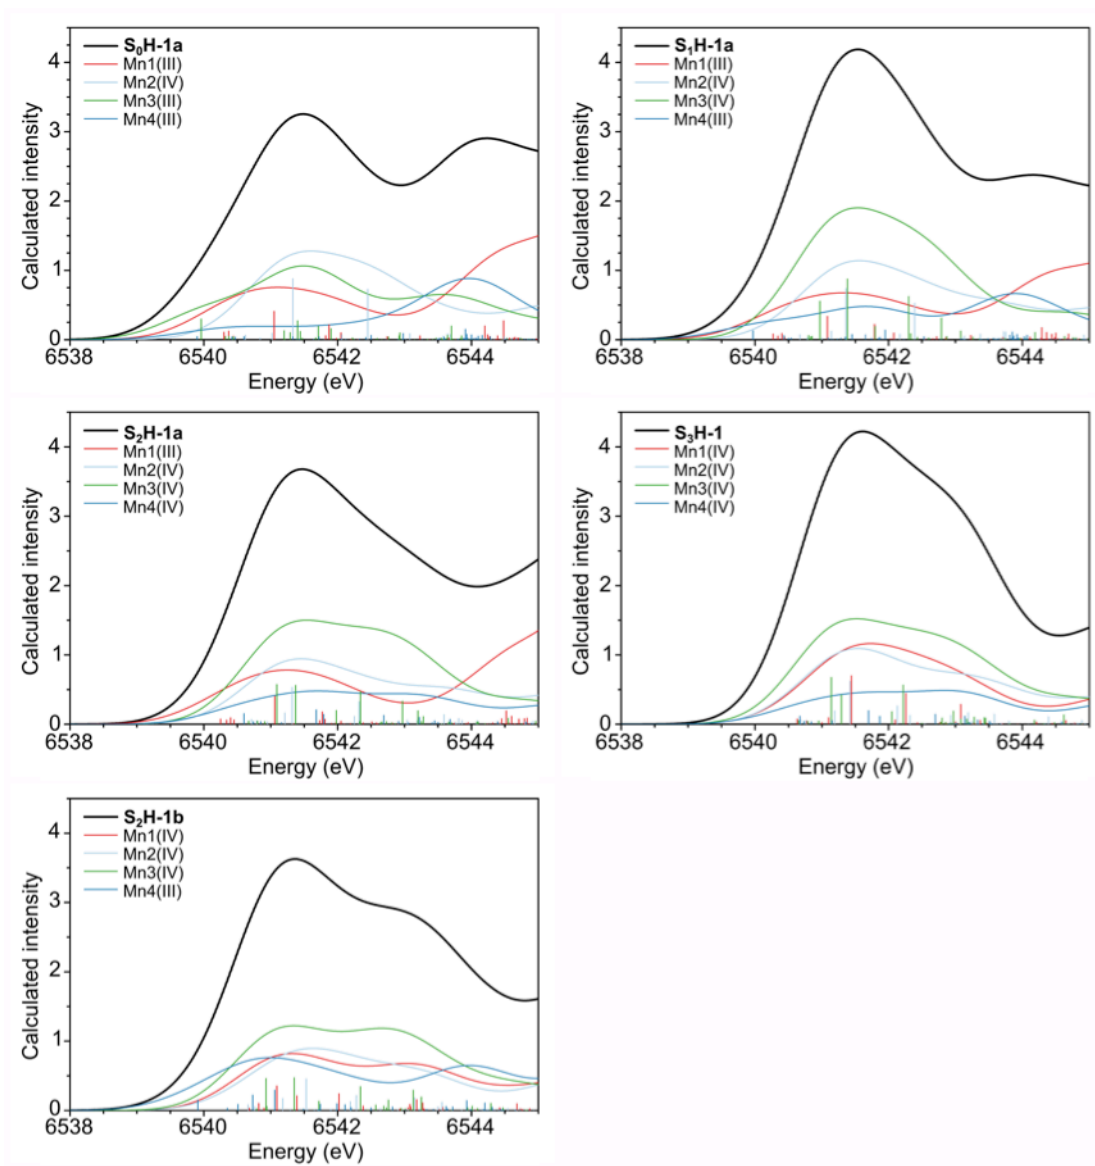

**Figure S15.** Spectra of selected high-valent models with their contributions from the individual Mn ions.

## Part VIII. Analysis of low-valent models in terms of super-reduced S states

The LV structures reported in this work may serve as models of super-reduced (negative) S states of the OEC. Specifically, the  $S_1L$  and  $S_0L$  models presented in this work are candidates for the  $S_{-1}$  and  $S_{-2}$  states of the OEC, respectively. Such negative states have been invoked to rationalize the photoreduced crystallographic model of PSII, but they are also accessible by chemical<sup>29, 30</sup> and other<sup>31</sup> treatments and have been studied experimentally by XANES,<sup>32</sup> EXAFS,<sup>29</sup> and EPR spectroscopies.<sup>30, 33-36</sup> Importantly, the structural integrity of the  $Mn_4Ca$  cluster seems to be maintained in the negative S states as they can be flash-advanced to active,  $O_2$ -evolving centers.<sup>33, 37</sup> The protonation level of reduced states with respect to  $S_0$  is ill-defined, but based on the relative energies and whether the models can be formally connected to  $S_0H-1$ , potential candidates for  $S_{-1}$  ( $S_1L-1$ ,  $S_1L-6$ , and  $S_1L-7a$ ) and  $S_{-2}$  ( $S_0L-3$ ,  $S_0L-4$ , and  $S_0L-6$ ) can be identified among the models presented in this paper (see Figure S16).

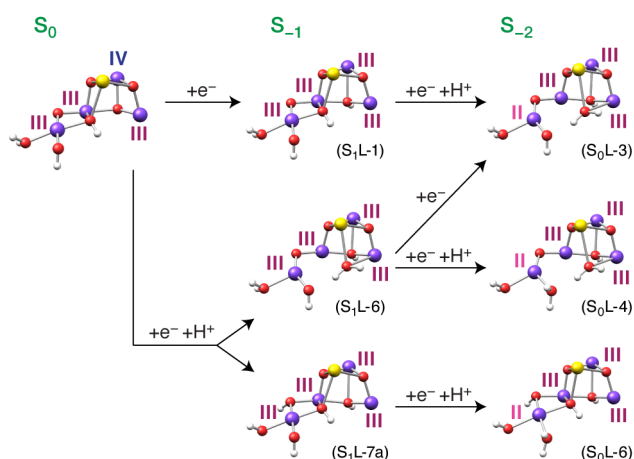

**Figure S16.** Possible pathways for the formation of reduced  $S_{-1}$  and  $S_{-2}$  states. The labels in parentheses refer to the corresponding LV models reported in this study.

Geometries of OEC models with average oxidation states lower than those for  $S_0$  have been compared to the crystal structure of 1.9 Å resolution to assess the extent of radiation damage.<sup>38</sup> According to this study, the inorganic core of the crystal structure can be structurally reproduced best by a mixture of  $S_{-4}$  (2%),  $S_{-3}$  (56%),  $S_{-2}$  (16%),  $S_{-1}$  (12%) and  $S_0$



(14%) models. One of the  $S_{-1}$  models best matching the crystal structure in that study has the same protonation pattern as model **S<sub>1</sub>L-7a**, and the best  $S_{-2}$  model has the same protonation pattern as **S<sub>0</sub>L-6**. If **S<sub>0</sub>L-6** corresponds to the physiological  $S_{-2}$  state, model **S<sub>0</sub>H-1** could be reached with single proton losses at each oxidation step, thus connecting the super-reduced models (Figure S16) to the catalytic cycle. A Mn(II)-Mn(III) dimer was proposed to exist for states reduced below  $S_{-1}$ ,<sup>33-35,37</sup> which agrees well with the candidates identified above, where all plausible  $S_{-1}$  models have a Mn(III)<sub>4</sub> and all  $S_{-2}$  models a Mn(II)Mn(III)<sub>3</sub> configuration. All these models are characterized by high spin ground states ( $S_{GS} \geq 3$  for  $S_{-1}$  and  $S_{GS} \geq 7/2$  for  $S_{-2}$ ). Although  $S_{-1}$  and  $S_{-2}$  have been proposed to possess low-spin coupled Mn clusters leading to a diamagnetic  $S_{GS} = 0$  ground state for  $S_{-1}$  and an  $S_{GS} = 1/2$  state for  $S_{-2}$ ,<sup>37,39</sup> such low spin intermediate states are only EPR-visible upon addition of NO, a paramagnetic molecule itself, making direct comparison of spin states impossible at this time. We also cannot exclude that the structure of the cluster is significantly perturbed by the reductants used in chemical treatments of the  $S_0$  state, or that over-reduction *per se* leads to conformational changes that are not covered by the present models.

## References

1. Y. Umena, K. Kawakami, J.-R. Shen and N. Kamiya, *Nature*, 2011, **473**, 55-60.
2. D. A. Pantazis, M. Orio, T. Petrenko, S. Zein, E. Bill, W. Lubitz, J. Messinger and F. Neese, *Chem.—Eur. J.*, 2009, **15**, 5108-5123.
3. D. A. Pantazis, M. Orio, T. Petrenko, S. Zein, W. Lubitz, J. Messinger and F. Neese, *Phys. Chem. Chem. Phys.*, 2009, **11**, 6788-6798.
4. M. Orio, D. A. Pantazis and F. Neese, *Photosynth. Res.*, 2009, **102**, 443-453.
5. V. Krewald, F. Neese and D. A. Pantazis, *J. Am. Chem. Soc.*, 2013, **135**, 5726-5739.
6. M. Orio, D. A. Pantazis, T. Petrenko and F. Neese, *Inorg. Chem.*, 2009, **48**, 7251-7260.
7. S. Schinzel and M. Kaupp, *Can. J. Chem.*, 2009, **87**, 1521-1539.
8. D. A. Pantazis, V. Krewald, M. Orio and F. Neese, *Dalton Trans.*, 2010, **39**, 4959-4967.
9. J. Schraut, A. V. Arbuznikov, S. Schinzel and M. Kaupp, *ChemPhysChem*, 2011, **12**, 3170-3179.
10. D. Bovi and L. Guidoni, *J. Chem. Phys.*, 2012, **137**, 114107.
11. C. Baffert, M. Orio, D. A. Pantazis, C. Duboc, A. G. Blackman, G. Blondin, F. Neese, A. Deronzier and M.-N. Collomb, *Inorg. Chem.*, 2009, **48**, 10281-10288.
12. C.-L. Zhou, Z.-M. Wang, B.-W. Wang and S. Gao, *Dalton Trans.*, 2012, **41**, 13620-13625.
13. T. C. Stamatatos, D. Foguet-Albiol, S.-C. Lee, C. C. Stoumpos, C. P. Raptopoulou, A. Terzis, W. Wernsdorfer, S. O. Hill, S. P. Perlepes and G. Christou, *J. Am. Chem. Soc.*, 2007, **129**, 9484-9499.
14. J. S. Kanady, E. Y. Tsui, M. W. Day and T. Agapie, *Science*, 2011, **333**, 733-736.
15. S. Mukherjee, J. A. Stull, J. Yano, T. C. Stamatatos, K. Pringouri, T. A. Stich, K. A. Abboud, R. D. Britt, V. K. Yachandra and G. Christou, *Proc. Natl. Acad. Sci. U.S.A.*, 2012, **109**, 2257-2262.
16. C. Philouze, G. Blondin, J.-J. Girerd, J. Guilhem, C. Pascard and D. Lexa, *J. Am. Chem. Soc.*, 1994, **116**, 8557-8565.
17. G. Blondin, R. Davydov, C. Philouze, M.-F. Charlot, S. Styring, B. Åkermark, J.-J. Girerd and A. Boussac, *J. Chem. Soc., Dalton Trans.*, 1997, 4069-4074.
18. G. Karotsis, L. F. Jones, G. S. Papaefstathiou, A. Collins, S. Parsons, T. D. Nguyen, M. Evangelisti and E. K. Brechin, *Dalton Trans.*, 2008, 4917-4925.
19. C. E. Dubé, S. Mukhopadhyay, P. J. Bonitatebus, R. J. Staples and W. H. Armstrong, *Inorg. Chem.*, 2005, **44**, 5161-5175.
20. J.-Z. Wu, E. Sellitto, G. P. A. Yap, J. Sheats and G. C. Dismukes, *Inorg. Chem.*, 2004, **43**, 5795-5797.
21. U. Bossek, H. Hummel, T. Weyhermüller, K. Wieghardt, S. Russell, L. van der Wolf and U. Kolb, *Angew. Chem., Int. Ed.*, 1996, **35**, 1552-1554.
22. N. Cox, W. Ames, B. Epel, L. V. Kulik, L. Rapatskiy, F. Neese, J. Messinger, K. Wieghardt and W. Lubitz, *Inorg. Chem.*, 2011, **50**, 8238-8251.
23. A. Schweiger and G. Jeschke, *Principles of pulse electron paramagnetic resonance*, Oxford University Press, Oxford, 2001.
24. L. V. Kulik, B. Epel, W. Lubitz and J. Messinger, *J. Am. Chem. Soc.*, 2005, **127**, 2392-2393.
25. L. V. Kulik, B. Epel, W. Lubitz and J. Messinger, *J. Am. Chem. Soc.*, 2007, **129**, 13421-13435.
26. J. M. Peloquin, K. A. Campbell, D. W. Randall, M. A. Evanchik, V. L. Pecoraro, W. H. Armstrong and R. D. Britt, *J. Am. Chem. Soc.*, 2000, **122**, 10926-10942.
27. J. M. Peloquin and R. D. Britt, *Biochim. Biophys. Acta Bioenerg.*, 2001, **1503**, 96-111.

28. T. E. Westre, P. Kennepohl, J. G. DeWitt, B. Hedman, K. O. Hodgson and E. I. Solomon, *J. Am. Chem. Soc.*, 1997, **119**, 6297-6314.
29. P. J. Riggs-Gelasco, R. Mei, C. F. Yocum and J. E. Penner-Hahn, *J. Am. Chem. Soc.*, 1996, **118**, 2387-2399.
30. C. Goussias, N. Ioannidis and V. Petrouleas, *Biochemistry*, 1997, **36**, 9261-9266.
31. M. Higuchi, T. Noguchi and K. Sonoike, *Biochim. Biophys. Acta Bioenerg.*, 2003, **1604**, 151-158.
32. P. J. Riggs, C. F. Yocum, J. E. Penner-Hahn and R. Mei, *J. Am. Chem. Soc.*, 1992, **114**, 10650-10651.
33. N. Ioannidis, J. Sarrou, G. Schansker and V. Petrouleas, *Biochemistry*, 1998, **37**, 16445-16451.
34. J. Sarrou, N. Ioannidis, Y. Deligiannakis and V. Petrouleas, *Biochemistry*, 1998, **37**, 3581-3587.
35. J. Hanley, J. Sarrou and V. Petrouleas, *Biochemistry*, 2000, **39**, 15441-15445.
36. J. Sarrou, S. Isgandarova, J. Kern, A. Zouni, G. Renger, W. Lubitz and J. Messinger, *Biochemistry*, 2003, **42**, 1016-1023.
37. G. Schansker, C. Goussias, V. Petrouleas and A. W. Rutherford, *Biochemistry*, 2002, **41**, 3057-3064.
38. A. Galstyan, A. Robertazzi and E. W. Knapp, *J. Am. Chem. Soc.*, 2012, **134**, 7442-7449.
39. D. Koulougliotis, *Photosynthetica*, 2009, **47**, 567-574.
